# Supplementary material for: Highly stable and differentially arranged hexanuclear lanthanide clusters: structure, assembly mechanism, and magnetic resonance imaging
Source: Royal Society of Chemistry journal article supplement (doi:10.1039/d3qi01490h), 2023-01-01
Supplement: d3qi01490h1.pdf [file d3qi01490h1.pdf]

## Supporting Information

### **Highly Stable and Differentially Arranged Hexanuclear Lanthanide Clusters: Structure, Assembly Mechanism, and Magnetic Resonance Imaging**

Wen-Wen Qin,<sup>a</sup> Yun-Lan Li,<sup>a</sup> Zhong-Hong Zhu,<sup>a,\*</sup> Fu-Pei Liang,<sup>a</sup> Qiong Hu,<sup>b,\*</sup> Hua-Hong Zou<sup>a,\*</sup>

<sup>a</sup>School of Chemistry and Pharmaceutical Sciences, State Key Laboratory for Chemistry and Molecular Engineering of Medicinal Resources, Guangxi Normal University, Guilin 541004, P. R. China \*E-mail (Corresponding author): 18317725515@163.com (Z.-H. Zhu), gxnuchem@foxmail.com (H.-H. Zou).

<sup>b</sup>Guangxi Key Laboratory of Agricultural Resources Chemistry and Biotechnology, College of Chemistry and Food Science, Yulin Normal University, Yulin 537000, P. R. China \*E-mail (Corresponding author): huqiongscut@163.com (Q. Hu).

**Keywords:** Lanthanide cluster; Assembly mechanism; Solvothermal synthesis; Precise synthesis; Magnetic properties

## Table of Contents:

| Supporting Tables  |                                                                                                                                                                                                               |
|--------------------|---------------------------------------------------------------------------------------------------------------------------------------------------------------------------------------------------------------|
| <b>Table S1</b>    | Crystallographic data of the clusters <b>Dy<sub>6</sub></b> and <b>HNP-Dy<sub>6</sub></b> .                                                                                                                   |
| <b>Table S2</b>    | Selected bond lengths (Å) and angles (°) of cluster <b>Dy<sub>6</sub></b> .                                                                                                                                   |
| <b>Table S3</b>    | Selected bond lengths (Å) and angles (°) of cluster <b>HNP-Dy<sub>6</sub></b> .                                                                                                                               |
| <b>Table S4</b>    | <i>SHAPE</i> analysis of the Dy(III) in cluster <b>Dy<sub>6</sub></b> .                                                                                                                                       |
| <b>Table S5</b>    | <i>SHAPE</i> analysis of the Dy(III) in cluster <b>HNP-Dy<sub>6</sub></b> .                                                                                                                                   |
| <b>Table S6</b>    | Major species assigned in the HRESI-MS of <b>Dy<sub>6</sub></b> in positive mode.                                                                                                                             |
| <b>Table S7</b>    | Major species assigned in the HRESI-MS of <b>HNP-Dy<sub>6</sub></b> in positive mode.                                                                                                                         |
| <b>Table S8</b>    | Major species assigned in the HRESI-MS of <b>Dy<sub>6</sub></b> with different in-source CID (0–100 eV) in positive mode.                                                                                     |
| <b>Table S9</b>    | Major species assigned in the HRESI-MS of <b>HNP-Dy<sub>6</sub></b> with different in-source CID (0–100 eV) in positive mode.                                                                                 |
| <b>Table S10</b>   | Major species assigned in the Time-dependent HRESI-MS of <b>Dy<sub>6</sub></b> in positive mode.                                                                                                              |
| <b>Table S11</b>   | Major species assigned in the Time-dependent HRESI-MS of <b>HNP-Dy<sub>6</sub></b> in positive mode.                                                                                                          |
| Supporting Figures |                                                                                                                                                                                                               |
| <b>Figure S1</b>   | Infrared spectra (IR) of clusters <b>Dy<sub>6</sub></b> , <b>Gd<sub>6</sub></b> (a) and <b>HNP-Dy<sub>6</sub></b> (b).                                                                                        |
| <b>Figure S2</b>   | TG curve of <b>Dy<sub>6</sub></b> (a) and <b>HNP-Dy<sub>6</sub></b> (b).                                                                                                                                      |
| <b>Figure S3</b>   | Powder diffraction pattern (PXRD) of clusters <b>Dy<sub>6</sub></b> , <b>Gd<sub>6</sub></b> (a) and <b>HNP-Dy<sub>6</sub></b> (b).                                                                            |
| <b>Figure S4</b>   | The superposed simulated and observed spectra of several species for cluster <b>Dy<sub>6</sub></b> .                                                                                                          |
| <b>Figure S5</b>   | The superposed simulated and observed spectra of several species for cluster <b>HNP-Dy<sub>6</sub></b> .                                                                                                      |
| <b>Figure S6</b>   | The superposed simulated and observed spectra of several species for <b>Dy<sub>6</sub></b> with different in-source CID (0–100 eV).                                                                           |
| <b>Figure S7</b>   | The superposed simulated and observed spectra of several species for <b>HNP-Dy<sub>6</sub></b> with different in-source CID (0–100 eV).                                                                       |
| <b>Figure S8</b>   | Time-dependent HRESI-MS spectra for the assembly of <b>Dy<sub>6</sub></b> in positive mode.                                                                                                                   |
| <b>Figure S9</b>   | Time-dependent HRESI-MS spectra for the assembly of <b>HNP-Dy<sub>6</sub></b> in positive mode.                                                                                                               |
| <b>Figure S10</b>  | Stability of <b>Gd<sub>6</sub></b> dispersed in (a) H <sub>2</sub> O and (b) PBS for 5 days, UV-Vis absorption spectra of <b>Gd<sub>6</sub></b> in (c) H <sub>2</sub> O and (d) PBS.                          |
| <b>Figure S11</b>  | Temperature dependence of $\chi_m T$ for (a) <b>Dy<sub>6</sub></b> and (c) <b>HNP-Dy<sub>6</sub></b> , <i>M</i> vs. <i>H/T</i> plots of (b) <b>Dy<sub>6</sub></b> and (d) <b>HNP-Dy<sub>6</sub></b> .         |
| <b>Figure S12</b>  | Loop curve graph of <b>Dy<sub>6</sub></b> (a) and <b>HNP-Dy<sub>6</sub></b> (b) at 2 K.                                                                                                                       |
| <b>Figure S13</b>  | Temperature dependence of the real ( $\chi'$ ) and imaginary ( $\chi''$ ) ac susceptibilities at different frequencies in the 0 Oe dc fields for <b>Dy<sub>6</sub></b> (a) and <b>HNP-Dy<sub>6</sub></b> (b). |
| <b>Figure S14</b>  | Magnetic entropy change ( $-\Delta S_m$ ) of <b>Gd<sub>6</sub></b> at different temperatures (2–8 K) and magnetic fields (0–7 T).                                                                             |

## Experimental Section

### Materials and Measurements.

All reagents were obtained from commercial sources and used without further purification. Elemental analyses for C, H and O were performed on a varia MICRO cube. The infrared spectra were carried out on a Pekin-Elmer Two spectrophotometer with pressed KBr pellets. The powder X-ray diffraction (PXRD) spectra were measured on a Rigaku D/Max-3c diffractometer with Mo K $\alpha$  radiation ( $\lambda = 0.71073 \text{ \AA}$ ). Thermogravimetric analyses were performed on a PerkinElmer PyrisDiamond TG-DTA instrument under an N<sub>2</sub> atmosphere using a heating rate of 5 °C min<sup>-1</sup> from room temperature up to 1000 °C. Magnetic properties were performed on a Superconducting Quantum Interference Device (SQUID) magnetometer. The diamagnetism of all constituent atoms was corrected with Pascal's constant.

### Single crystal X-ray crystallography.

Diffraction data for the complex were collected on a ROD, Synergy Custom DW system, HyPix diffractometer (Mo-K $\alpha$  radiation and  $\lambda = 0.71073 \text{ \AA}$ ) in  $\Phi$  and  $\omega$  scan modes. The structures were solved by direct methods, and refined by a full-matrix least-squares method on the basis of  $F^2$  by using SHELXL and OLEX2.<sup>[1]</sup> Anisotropic thermal parameters were applied to all non-hydrogen atoms. Hydrogen atoms were generated geometrically. The crystallographic data for **Dy<sub>6</sub>** and **HNP-Dy<sub>6</sub>** are listed in Table S1, and selected bond lengths and angles are given in Table S2 and S3. The CCDC reference numbers for the crystal structures of **Dy<sub>6</sub>** and **HNP-Dy<sub>6</sub>** are 2283643 and 2283644.

### HRESI-MS measurement.

HRESI-MS measurements were conducted at a capillary temperature of 275 °C. Aliquots of the solution were injected into the device at 2  $\mu$ L. The mass spectrometer used for the measurements was a ThermoExactive and the data were collected in positive and negative ion modes. The spectrometer was previously calibrated with the standard tune mix to give a precision of *ca.* 2 ppm. within the region of  $m/z = 200\text{--}4000$ . The capillary voltage was 50 V, the tube lens voltage was 150 V, and the skimmer voltage was 25 V.

[1] Sheldrick, G. M. *Acta Crystallogr., Sect. C: Struct. Chem.* **2015**, *71*, 3–8.

### The synthesis method.

**Synthesis of  $H_2L^1$  ( $N^2,N^6$ -bis(4-(diethylamino)-2-hydroxybenzylidene)pyridine-2,6-dicarbohydrazide):** Pyridine-2,6-dicarbohydrazide (5 mmol, 0.976 g) was taken in a 50 mL round-bottomed flask and dissolved in 40 mL of ethanol and stirred for 30 min. 4-( $N,N$ -Diethylamino)salicylaldehyde (10 mmol, 1.93 g) was added in portions to the aforesaid solution of pyridine-2,6-dicarbohydrazide. To this, two drops of concentrated sulfuric acid was added and the solution refluxed for 12 h. The resulting yellow solid (2.10 g, 76.92%) was filter under vacuum, washed methanol followed by drying under reduced pressure.

**Synthesis of  $H_2L^2$  ( $N^2,N^6$ -bis((2-hydroxynaphthalen-1-yl)methylene)pyridine-2,6-dicarbohydrazide):** Pyridine-2,6-dicarbohydrazide (5 mmol, 0.976 g) was taken in a 50 mL round-bottomed flask and dissolved in 40 mL of ethanol and stirred for 30 min. 2-Hydroxy-1-naphthaldehyde (10 mmol, 1.72 g) was added in portions to the aforesaid solution of pyridine-2,6-dicarbohydrazide. To this, two drops of concentrated sulfuric acid was added and the solution refluxed for 12 h. The resulting yellow solid (1.92 g, 73.80%) was filter under vacuum, washed methanol followed by drying under reduced pressure.

**Synthesis of  $Dy_6$ :** A mixture of  $H_2L^1$  (0.05 mmol, 27.3 mg), 0.4 mmol  $Dy(OAc)_3 \cdot 4H_2O$  (approximately 165 mg), and triethylamine (100  $\mu$ L) were dissolved in mixed solvent ( $CH_3OH:H_2O = 1.0 \text{ mL}:0.3 \text{ mL}$ ) in a Pyrex tube. The tube was sealed and heated at 80  $^\circ$ C in an oven for 2 days, orange crystals were observed with a yield of about 45% (based on  $Dy(OAc)_3 \cdot 4H_2O$ ). Elemental analysis theoretical value ( $C_{70}H_{92}Dy_6N_{14}O_{28}$ ): C, 32.94%; H, 3.63%; N, 7.68%; experimental value: C, 32.82%; H, 3.51%; N, 7.56%. Infrared spectrum data (IR, KBr pellet,  $cm^{-1}$ ): 3429 (m), 2970 (m), 1600 (s), 1565 (s), 1432 (w), 1136 (s), 1077 (s), 829 (m), 758 (m).

**Synthesis of  $Gd_6$ :** A mixture of  $H_2L^1$  (0.05 mmol, 27.3 mg), 0.4 mmol  $Gd(OAc)_3 \cdot H_2O$  (approximately 141 mg), and triethylamine (100  $\mu$ L) were dissolved in mixed solvent ( $CH_3OH:H_2O = 1.0 \text{ mL}:0.3 \text{ mL}$ ) in a Pyrex tube. The tube was sealed and heated at 80  $^\circ$ C in an oven for 2 days, orange crystals were observed with a yield of about 44% (based on  $Gd(OAc)_3 \cdot H_2O$ ). Infrared spectrum data (IR, KBr pellet,  $cm^{-1}$ ): 3429 (m), 2970 (m), 1601 (s), 1568 (s), 1431 (w), 1138 (s), 1077 (s), 829 (m), 758 (m).

**Synthesis of HNP- $Dy_6$ :** A mixture of  $H_2L^2$  (0.05 mmol, 25.2 mg), 0.4 mmol  $Dy(OAc)_3 \cdot 4H_2O$  (approximately 165 mg), and triethylamine (100  $\mu$ L) were dissolved in 2.0 mL of  $CH_3OH$  in a Pyrex

tube. The tube was sealed and heated at 80 °C in an oven for 2 days, yellow crystals were observed with a yield of about 40% (based on  $\text{Dy}(\text{OAc})_3 \cdot 4\text{H}_2\text{O}$ ). Elemental analysis theoretical value ( $\text{C}_{76}\text{H}_{94}\text{Dy}_6\text{N}_{10}\text{O}_{34}$ ): C, 34.22%; H, 3.53%; N, 5.25%; experimental value: C, 34.06%; H, 3.47%; N, 5.16%. Infrared spectrum data (IR, KBr pellet,  $\text{cm}^{-1}$ ): 3429 (m), 1601 (s), 1384 (s), 1350 (s), 1200 (m), 827 (m), 752 (s).

#### **Solution MRI imaging experiments.**

**Gd<sub>6</sub>**: Prepare 1 mL of **Gd<sub>6</sub>** solution with a concentration of 23.5  $\mu\text{M}$  (the content of DMSO is less than 1%, which is used for solubilization). After conversion of results (**Gd<sub>6</sub>**:Gd(III) ions = 1:6), the molar concentration of Gd(III) ions in the above-mentioned **Gd<sub>6</sub>** mother liquor was obtained as 141.0  $\mu\text{M}$ . For solution MRI imaging experiments, the above-mentioned solutions containing Gd(III) ions at a concentration of 141.0  $\mu\text{M}$  were diluted to 0.11, 0.23, 0.35, 0.47, 0.59 and 0.71  $\mu\text{M}$ , respectively.

**Table S1.** Crystallographic data of the clusters **Dy<sub>6</sub>** and **HNP-Dy<sub>6</sub>**.

|                                                                 | <b>Dy<sub>6</sub></b>                                                           | <b>HNP-Dy<sub>6</sub></b>                                                       |
|-----------------------------------------------------------------|---------------------------------------------------------------------------------|---------------------------------------------------------------------------------|
| Empirical formula                                               | C <sub>70</sub> H <sub>92</sub> Dy <sub>6</sub> N <sub>14</sub> O <sub>28</sub> | C <sub>76</sub> H <sub>94</sub> Dy <sub>6</sub> N <sub>10</sub> O <sub>34</sub> |
| Formula weight                                                  | 2550.95                                                                         | 2664.98                                                                         |
| <i>T</i> , K                                                    | 295 K                                                                           | 296 K                                                                           |
| Crystal system                                                  | triclinic                                                                       | triclinic                                                                       |
| Space group                                                     | <i>P</i> -1                                                                     | <i>P</i> -1                                                                     |
| <i>a</i> , Å                                                    | 10.2039(1)                                                                      | 11.4673(8)                                                                      |
| <i>b</i> , Å                                                    | 11.9012(1)                                                                      | 14.0210(7)                                                                      |
| <i>c</i> , Å                                                    | 19.2989(2)                                                                      | 14.7578(6)                                                                      |
| <i>α</i> , °                                                    | 86.127                                                                          | 106.670                                                                         |
| <i>β</i> , °                                                    | 86.641                                                                          | 90.919                                                                          |
| <i>γ</i> , °                                                    | 67.183                                                                          | 96.016                                                                          |
| <i>V</i> , Å <sup>3</sup>                                       | 2153.97(4)                                                                      | 2257.9(2)                                                                       |
| <i>Z</i>                                                        | 1                                                                               | 1                                                                               |
| <i>D<sub>c</sub></i> , g cm <sup>3</sup>                        | 1.967                                                                           | 1.960                                                                           |
| <i>μ</i> , mm <sup>-1</sup>                                     | 27.97                                                                           | 26.76                                                                           |
| <i>F</i> (000)                                                  | 1229                                                                            | 1287                                                                            |
| 2 <i>θ</i> range for data collection/°                          | 4.592 to 133.198                                                                | 6.26 to 153.3                                                                   |
| Reflns coll.                                                    | 23012                                                                           | 35481                                                                           |
| Unique reflns                                                   | 7591                                                                            | 8747                                                                            |
| <i>R</i> <sub>int</sub>                                         | 0.0896                                                                          | 0.1266                                                                          |
| <i>R</i> <sub>1</sub> <sup>a</sup> ( <i>I</i> > 2σ( <i>I</i> )) | 0.0957                                                                          | 0.1098                                                                          |
| <i>wR</i> <sub>2</sub> <sup>b</sup> (all data)                  | 0.2661                                                                          | 0.3115                                                                          |
| GOF                                                             | 1.049                                                                           | 1.090                                                                           |

$$^a R_1 = \frac{\sum ||F_o| - |F_c||}{\sum |F_o|}, \quad ^b wR_2 = [\frac{\sum w(F_o^2 - F_c^2)^2}{\sum w(F_o^2)^2}]^{1/2}$$

**Table S2.** Selected bond lengths (Å) and angles (°) of cluster **Dy<sub>6</sub>**.

| <b>Bond lengths (Å)</b> |           |                     |           |                      |           |
|-------------------------|-----------|---------------------|-----------|----------------------|-----------|
| Dy1-O4                  | 2.195(10) | Dy2-O13             | 2.338(8)  | Dy3-O10              | 2.303(10) |
| Dy1-O14                 | 2.249(11) | Dy2-O6              | 2.344(10) | Dy3-O1               | 2.315(9)  |
| Dy1-O7                  | 2.290(10) | Dy2-O2              | 2.353(9)  | Dy3-O5 <sup>i</sup>  | 2.352(9)  |
| Dy1-O1 <sup>i</sup>     | 2.323(9)  | Dy2-O12             | 2.389(11) | Dy3-O8               | 2.394(10) |
| Dy1-O3                  | 2.328(9)  | Dy2-O5 <sup>i</sup> | 2.403(9)  | Dy3-O13 <sup>i</sup> | 2.446(9)  |
| Dy1-O13                 | 2.427(9)  | Dy2-O3              | 2.448(9)  | Dy3-N2               | 2.492(10) |
| Dy1-N6                  | 2.494(13) | Dy2-N4              | 2.532(11) | Dy3-O11              | 2.505(12) |
| Dy2-O5                  | 2.313(9)  | Dy3-O2              | 2.295(10) |                      |           |

  

| <b>Bond angles (°)</b>   |          |                         |          |                                       |          |
|--------------------------|----------|-------------------------|----------|---------------------------------------|----------|
| O4-Dy1-O14               | 84.5(4)  | O6-Dy2-O2               | 101.6(3) | O2-Dy3-O5 <sup>i</sup>                | 71.9(3)  |
| O4-Dy1-O7                | 98.2(4)  | O5-Dy2-O12              | 136.1(4) | O10-Dy3-O5 <sup>i</sup>               | 83.7(3)  |
| O14-Dy1-O7               | 87.0(4)  | O13-Dy2-O12             | 80.1(4)  | O1-Dy3-O5 <sup>i</sup>                | 132.8(3) |
| O4-Dy1-O1 <sup>i</sup>   | 98.9(4)  | O6-Dy2-O12              | 71.6(4)  | O2-Dy3-O8                             | 109.2(4) |
| O14-Dy1-O1 <sup>i</sup>  | 95.4(4)  | O2-Dy2-O12              | 105.4(4) | O10-Dy3-O8                            | 72.2(4)  |
| O7-Dy1-O1 <sup>i</sup>   | 162.9(3) | O5-Dy2-O5 <sup>i</sup>  | 70.4(4)  | O1-Dy3-O8                             | 81.2(4)  |
| O4-Dy1-O3                | 137.0(4) | O13-Dy2-O5 <sup>i</sup> | 91.9(3)  | O5 <sup>i</sup> -Dy3-O8               | 137.4(4) |
| O14-Dy1-O3               | 138.3(4) | O6-Dy2-O5 <sup>i</sup>  | 140.3(3) | O2-Dy3-O13 <sup>i</sup>               | 77.3(3)  |
| O7-Dy1-O3                | 83.1(3)  | O2-Dy2-O5 <sup>i</sup>  | 70.0(3)  | O10-Dy3-O13 <sup>i</sup>              | 120.9(4) |
| O1 <sup>i</sup> -Dy1-O3  | 83.9(3)  | O12-Dy2-O5 <sup>i</sup> | 73.6(4)  | O1-Dy3-O13 <sup>i</sup>               | 71.9(3)  |
| O4-Dy1-O13               | 158.6(3) | O5-Dy2-O3               | 77.4(3)  | O5 <sup>i</sup> -Dy3-O13 <sup>i</sup> | 74.1(3)  |
| O14-Dy1-O13              | 77.4(4)  | O13-Dy2-O3              | 62.2(3)  | O8-Dy3-O13 <sup>i</sup>               | 148.4(3) |
| O7-Dy1-O13               | 92.0(3)  | O6-Dy2-O3               | 74.5(3)  | O2-Dy3-N2                             | 63.1(3)  |
| O1 <sup>i</sup> -Dy1-O13 | 72.1(3)  | O2-Dy2-O3               | 126.0(3) | O10-Dy3-N2                            | 143.8(3) |
| O3-Dy1-O13               | 62.6(3)  | O12-Dy2-O3              | 122.6(4) | O1-Dy3-N2                             | 72.4(3)  |
| O4-Dy1-N6                | 72.7(4)  | O5 <sup>i</sup> -Dy2-O3 | 142.6(3) | O5 <sup>i</sup> -Dy3-N2               | 132.1(3) |
| O14-Dy1-N6               | 156.4(4) | O5-Dy2-N4               | 78.8(3)  | O8-Dy3-N2                             | 75.7(4)  |
| O7-Dy1-N6                | 90.4(4)  | O13-Dy2-N4              | 124.2(3) | O13 <sup>i</sup> -Dy3-N2              | 80.6(3)  |
| O1 <sup>i</sup> -Dy1-N6  | 94.0(4)  | O6-Dy2-N4               | 77.8(3)  | O2-Dy3-O11                            | 68.9(4)  |
| O3-Dy1-N6                | 64.4(4)  | O2-Dy2-N4               | 62.8(3)  | O10-Dy3-O11                           | 79.2(4)  |
| O13-Dy1-N6               | 126.2(3) | O12-Dy2-N4              | 144.2(4) | O1-Dy3-O11                            | 150.7(4) |
| O5-Dy2-O13               | 77.0(3)  | O5 <sup>i</sup> -Dy2-N4 | 125.0(3) | O5 <sup>i</sup> -Dy3-O11              | 71.2(4)  |

|            |          |            |          |                           |          |
|------------|----------|------------|----------|---------------------------|----------|
| O5-Dy2-O6  | 149.2(3) | O3-Dy2-N4  | 63.9(3)  | O8-Dy3-O11                | 70.2(4)  |
| O13-Dy2-O6 | 100.3(3) | O2-Dy3-O10 | 144.5(4) | O13 <sup>i</sup> -Dy3-O11 | 137.3(4) |
| O5-Dy2-O2  | 85.0(3)  | O2-Dy3-O1  | 129.0(3) | N2-Dy3-O11                | 105.2(4) |
| O13-Dy2-O2 | 158.0(3) | O10-Dy3-O1 | 86.5(4)  |                           |          |

**Table S3.** Selected bond lengths (Å) and angles (°) of cluster **HNP–Dy<sub>6</sub>**.

| <b>Bond lengths (Å)</b> |           |                          |           |                                      |           |
|-------------------------|-----------|--------------------------|-----------|--------------------------------------|-----------|
| Dy1-O6                  | 2.261(14) | Dy2-O3                   | 2.329(11) | Dy3-O4                               | 2.199(14) |
| Dy1-O2                  | 2.337(12) | Dy2-O2                   | 2.348(11) | Dy3-O3                               | 2.365(12) |
| Dy1-O1                  | 2.348(13) | Dy2-O10                  | 2.357(11) | Dy3-O9                               | 2.374(11) |
| Dy1-O9 <sup>i</sup>     | 2.363(13) | Dy2-O9                   | 2.373(12) | Dy3-O7 <sup>i</sup>                  | 2.381(16) |
| Dy1-O8                  | 2.39(2)   | Dy2-O11                  | 2.391(12) | Dy3-O12                              | 2.424(15) |
| Dy1-O5                  | 2.400(16) | Dy2-O10 <sup>i</sup>     | 2.400(11) | Dy3-O1 <sup>i</sup>                  | 2.462(12) |
| Dy1-N1                  | 2.468(16) | Dy2-O13                  | 2.411(15) | Dy3-O14                              | 2.47(2)   |
| Dy1-O10 <sup>i</sup>    | 2.475(11) | Dy2-N3                   | 2.542(14) | Dy3-N5                               | 2.510(17) |
| <b>Bond angles (°)</b>  |           |                          |           |                                      |           |
| O6-Dy1-O2               | 148.4(4)  | O3-Dy2-O2                | 127.1(4)  | O4-Dy3-O3                            | 134.4(5)  |
| O6-Dy1-O1               | 77.6(5)   | O3-Dy2-O10               | 119.5(4)  | O4-Dy3-O9                            | 151.1(5)  |
| O2-Dy1-O1               | 121.3(5)  | O2-Dy2-O10               | 104.5(4)  | O3-Dy3-O9                            | 73.0(4)   |
| O6-Dy1-O9 <sup>i</sup>  | 76.5(5)   | O3-Dy2-O9                | 73.6(4)   | O4-Dy3-O7 <sup>i</sup>               | 90.7(6)   |
| O2-Dy1-O9 <sup>i</sup>  | 85.6(4)   | O2-Dy2-O9                | 153.6(4)  | O3-Dy3-O7 <sup>i</sup>               | 77.4(5)   |
| O1-Dy1-O9 <sup>i</sup>  | 71.5(4)   | O10-Dy2-O9               | 71.2(4)   | O9-Dy3-O7 <sup>i</sup>               | 107.1(5)  |
| O6-Dy1-O8               | 102.4(7)  | O3-Dy2-O11               | 77.4(4)   | O4-Dy3-O12                           | 98.8(6)   |
| O2-Dy1-O8               | 76.5(7)   | O2-Dy2-O11               | 89.7(5)   | O3-Dy3-O12                           | 73.5(5)   |
| O1-Dy1-O8               | 145.6(6)  | O10-Dy2-O11              | 137.6(4)  | O9-Dy3-O12                           | 78.7(5)   |
| O9 <sup>i</sup> -Dy1-O8 | 142.6(6)  | O9-Dy2-O11               | 78.5(4)   | O7 <sup>i</sup> -Dy3-O12             | 147.1(5)  |
| O6-Dy1-O5               | 79.4(6)   | O3-Dy2-O10 <sup>i</sup>  | 148.0(4)  | O4-Dy3-O1 <sup>i</sup>               | 94.8(5)   |
| O2-Dy1-O5               | 126.6(5)  | O2-Dy2-O10 <sup>i</sup>  | 70.6(4)   | O3-Dy3-O1 <sup>i</sup>               | 122.9(4)  |
| O1-Dy1-O5               | 78.6(6)   | O10-Dy2-O10 <sup>i</sup> | 71.6(5)   | O9-Dy3-O1 <sup>i</sup>               | 69.3(4)   |
| O9 <sup>i</sup> -Dy1-O5 | 144.9(5)  | O9-Dy2-O10 <sup>i</sup>  | 83.5(4)   | O7 <sup>i</sup> -Dy3-O1 <sup>i</sup> | 74.7(5)   |
| O8-Dy1-O5               | 67.8(7)   | O11-Dy2-O10 <sup>i</sup> | 76.3(4)   | O12-Dy3-O1 <sup>i</sup>              | 135.0(5)  |
| O6-Dy1-N1               | 145.4(5)  | O3-Dy2-O13               | 84.2(4)   | O4-Dy3-O14                           | 75.9(7)   |
| O2-Dy1-N1               | 64.9(4)   | O2-Dy2-O13               | 81.7(5)   | O3-Dy3-O14                           | 135.4(7)  |



|                                       |          |                           |          |                          |          |
|---------------------------------------|----------|---------------------------|----------|--------------------------|----------|
| O1-Dy1-N1                             | 71.5(5)  | O10-Dy2-O13               | 73.3(4)  | O9-Dy3-O14               | 76.4(6)  |
| O9 <sup>i</sup> -Dy1-N1               | 107.2(5) | O9-Dy2-O13                | 119.9(5) | O7 <sup>i</sup> -Dy3-O14 | 143.5(7) |
| O8-Dy1-N1                             | 94.7(6)  | O11-Dy2-O13               | 149.0(4) | O12-Dy3-O14              | 69.3(7)  |
| O5-Dy1-N1                             | 79.6(5)  | O10 <sup>i</sup> -Dy2-O13 | 127.3(4) | O1 <sup>i</sup> -Dy3-O14 | 72.8(7)  |
| O6-Dy1-O10 <sup>i</sup>               | 79.8(5)  | O3-Dy2-N3                 | 63.8(4)  | O4-Dy3-N5                | 70.5(5)  |
| O2-Dy1-O10 <sup>i</sup>               | 69.5(4)  | O2-Dy2-N3                 | 63.3(4)  | O3-Dy3-N5                | 63.9(4)  |
| O1-Dy1-O10 <sup>i</sup>               | 138.2(4) | O10-Dy2-N3                | 143.4(4) | O9-Dy3-N5                | 135.2(4) |
| O9 <sup>i</sup> -Dy1-O10 <sup>i</sup> | 69.3(4)  | O9-Dy2-N3                 | 135.0(4) | O7 <sup>i</sup> -Dy3-N5  | 75.5(5)  |
| O8-Dy1-O10 <sup>i</sup>               | 73.6(6)  | O11-Dy2-N3                | 78.6(5)  | O12-Dy3-N5               | 78.2(6)  |
| O5-Dy1-O10 <sup>i</sup>               | 130.4(5) | O10 <sup>i</sup> -Dy2-N3  | 127.0(4) | O1 <sup>i</sup> -Dy3-N5  | 146.4(5) |
| N1-Dy1-O10 <sup>i</sup>               | 134.4(4) | O13-Dy2-N3                | 70.8(5)  | O14-Dy3-N5               | 128.3(7) |

**Table S4.** *SHAPE* analysis of the Dy(III) in cluster **Dy<sub>6</sub>**.

| Label    | Shape    | Symmetry                                     | Distortion (°)<br>Dy1 |
|----------|----------|----------------------------------------------|-----------------------|
| OP-8     | $D_{8h}$ | Octagon                                      | 44.094                |
| HPY-8    | $C_{7v}$ | Heptagonal pyramid                           | 35.496                |
| HBPY-8   | $D_{6h}$ | Hexagonal bipyramid                          | 31.256                |
| CU-8     | $O_h$    | Cube                                         | 28.991                |
| SAPR-8   | $D_{4d}$ | Square antiprism                             | 23.468                |
| TDD-8    | $D_{2d}$ | Triangular dodecahedron                      | 24.673                |
| JGBF-8   | $D_{2d}$ | Johnson-Gyrobifastigium (J26)                | 29.886                |
| JETBPY-8 | $D_{3h}$ | Johnson-Elongated triangular bipyramid (J14) | 39.795                |
| JBTP-8   | $C_{2v}$ | Johnson-Biaugmented trigonal prism (J50)     | 22.900                |
| BTPR-8   | $C_{2v}$ | Biaugmented trigonal prism                   | 24.299                |
| JSD-8    | $D_{2d}$ | Snub disphenoid (J84)                        | 23.867                |
| TT-8     | $T_d$    | Triakis tetrahedron                          | 27.667                |
| ETBPY-8  | $D_{3h}$ | Elongated trigonal bipyramid                 | 36.830                |

| Label    | Shape    | Symmetry                                     | Distortion (°)<br>Dy2 |
|----------|----------|----------------------------------------------|-----------------------|
| OP-8     | $D_{8h}$ | Octagon                                      | 47.368                |
| HPY-8    | $C_{7v}$ | Heptagonal pyramid                           | 36.884                |
| HBPY-8   | $D_{6h}$ | Hexagonal bipyramid                          | 28.688                |
| CU-8     | $O_h$    | Cube                                         | 30.401                |
| SAPR-8   | $D_{4d}$ | Square antiprism                             | 27.441                |
| TDD-8    | $D_{2d}$ | Triangular dodecahedron                      | 26.497                |
| JGBF-8   | $D_{2d}$ | Johnson-Gyrobifastigium (J26)                | 26.688                |
| JETBPY-8 | $D_{3h}$ | Johnson-Elongated triangular bipyramid (J14) | 38.847                |
| JBTP-8   | $C_{2v}$ | Johnson-Biaugmented trigonal prism (J50)     | 26.540                |

|         |          |                              |        |
|---------|----------|------------------------------|--------|
| BTPR-8  | $C_{2v}$ | Biaugmen tedtrigonal prism   | 26.281 |
| JSD-8   | $D_{2d}$ | Snub disphenoid (J84)        | 29.186 |
| TT-8    | $T_d$    | Triakis tetrahedron          | 29.269 |
| ETBPY-8 | $D_{3h}$ | Elongated trigonal bipyramid | 38.782 |

| Label   | Shape    | Symmetry                           | Distortion (°)<br>Dy3 |
|---------|----------|------------------------------------|-----------------------|
| HP-7    | $D_{7h}$ | Heptagon                           | 45.496                |
| HPY-7   | $C_{6v}$ | Heptagonal pyramid                 | 27.104                |
| PBPY-7  | $D_{5h}$ | Pentagonal bipyramid               | 26.955                |
| COC-7   | $C_{3v}$ | Capped octahedron                  | 29.777                |
| CTPR-7  | $C_{2v}$ | Capped trigonal prism              | 28.888                |
| JPBPY-7 | $D_{5h}$ | Johnson pentagonal bipyramid (J13) | 22.080                |
| JETPY-7 | $C_{3v}$ | Elongated triangular pyramid (J7)  | 36.682                |

**Table S5.** *SHAPE* analysis of the Dy(III) in cluster **HNP–Dy<sub>6</sub>**.

| Label    | Shape    | Symmetry                                     | Distortion (°)<br>Dy1 |
|----------|----------|----------------------------------------------|-----------------------|
| OP-8     | $D_{8h}$ | Octagon                                      | 45.913                |
| HPY-8    | $C_{7v}$ | Heptagonal pyramid                           | 37.158                |
| HBPY-8   | $D_{6h}$ | Hexagonal bipyramid                          | 32.223                |
| CU-8     | $O_h$    | Cube                                         | 32.187                |
| SAPR-8   | $D_{4d}$ | Square antiprism                             | 25.393                |
| TDD-8    | $D_{2d}$ | Triangular dodecahedron                      | 24.985                |
| JGBF-8   | $D_{2d}$ | Johnson-Gyrobifastigium (J26)                | 32.585                |
| JETBPY-8 | $D_{3h}$ | Johnson-Elongated triangular bipyramid (J14) | 41.206                |
| JBTP-8   | $C_{2v}$ | Johnson-Biaugmented trigonal prism (J50)     | 23.531                |
| BTPR-8   | $C_{2v}$ | Biaugmen tedtrigonal prism                   | 25.056                |
| JSD-8    | $D_{2d}$ | Snub disphenoid (J84)                        | 24.709                |
| TT-8     | $T_d$    | Triakis tetrahedron                          | 30.668                |
| ETBPY-8  | $D_{3h}$ | Elongated trigonal bipyramid                 | 39.882                |

| Label    | Shape    | Symmetry                                     | Distortion (°)<br>Dy2 |
|----------|----------|----------------------------------------------|-----------------------|
| OP-8     | $D_{8h}$ | Octagon                                      | 44.072                |
| HPY-8    | $C_{7v}$ | Heptagonal pyramid                           | 35.389                |
| HBPY-8   | $D_{6h}$ | Hexagonal bipyramid                          | 29.866                |
| CU-8     | $O_h$    | Cube                                         | 30.321                |
| SAPR-8   | $D_{4d}$ | Square antiprism                             | 26.024                |
| TDD-8    | $D_{2d}$ | Triangular dodecahedron                      | 25.248                |
| JGBF-8   | $D_{2d}$ | Johnson-Gyrobifastigium (J26)                | 27.258                |
| JETBPY-8 | $D_{3h}$ | Johnson-Elongated triangular bipyramid (J14) | 40.005                |
| JBTP-8   | $C_{2v}$ | Johnson-Biaugmented trigonal prism (J50)     | 25.637                |

|         |          |                              |        |
|---------|----------|------------------------------|--------|
| BTPR-8  | $C_{2v}$ | Biaugmen tedtrigonal prism   | 24.601 |
| JSD-8   | $D_{2d}$ | Snub disphenoid (J84)        | 26.990 |
| TT-8    | $T_d$    | Triakis tetrahedron          | 29.241 |
| ETBPY-8 | $D_{3h}$ | Elongated trigonal bipyramid | 37.982 |

| Label    | Shape    | Symmetry                                     | Distortion (°)<br>Dy3 |
|----------|----------|----------------------------------------------|-----------------------|
| OP-8     | $D_{8h}$ | Octagon                                      | 47.810                |
| HPY-8    | $C_{7v}$ | Heptagonal pyramid                           | 36.974                |
| HBPY-8   | $D_{6h}$ | Hexagonal bipyramid                          | 33.740                |
| CU-8     | $O_h$    | Cube                                         | 30.782                |
| SAPR-8   | $D_{4d}$ | Square antiprism                             | 25.697                |
| TDD-8    | $D_{2d}$ | Triangular dodecahedron                      | 25.391                |
| JGBF-8   | $D_{2d}$ | Johnson-Gyrobifastigium (J26)                | 31.608                |
| JETBPY-8 | $D_{3h}$ | Johnson-Elongated triangular bipyramid (J14) | 40.035                |
| JBTP-8   | $C_{2v}$ | Johnson-Biaugmented trigonal prism (J50)     | 25.885                |
| BTPR-8   | $C_{2v}$ | Biaugmen tedtrigonal prism                   | 26.108                |
| JSD-8    | $D_{2d}$ | Snub disphenoid (J84)                        | 26.906                |
| TT-8     | $T_d$    | Triakis tetrahedron                          | 29.643                |
| ETBPY-8  | $D_{3h}$ | Elongated trigonal bipyramid                 | 38.557                |

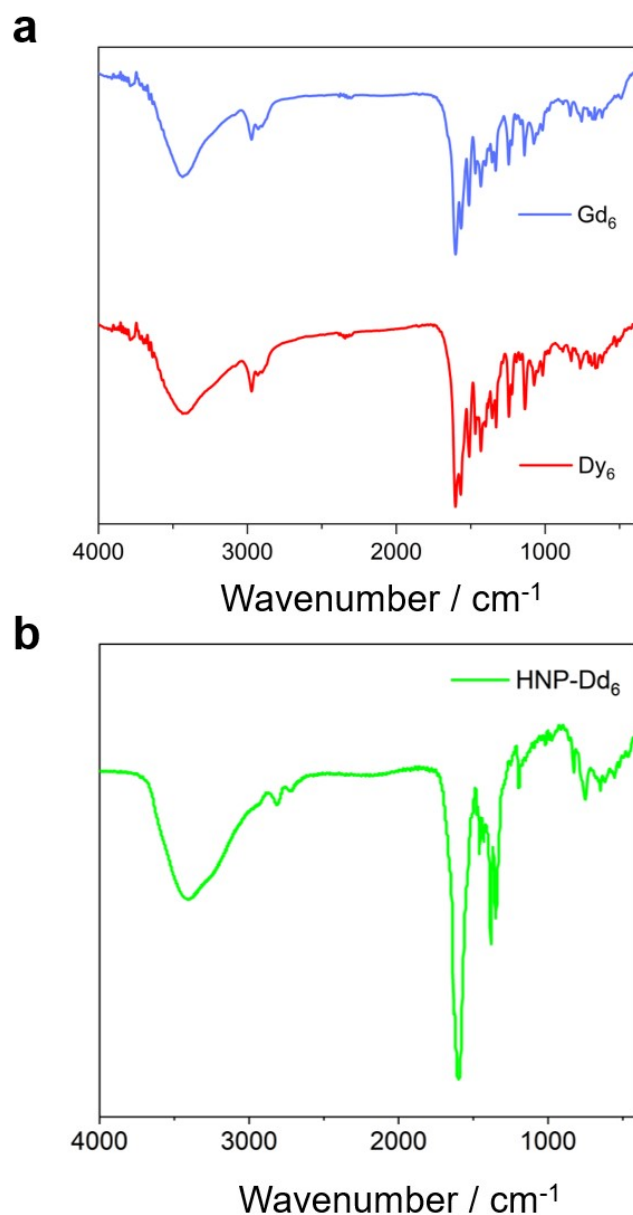

**Figure S1.** Infrared spectra (IR) of clusters  $\text{Dy}_6$ ,  $\text{Gd}_6$  (a) and  $\text{HNP-Dy}_6$  (b).

Fourier transform infrared absorption spectroscopy (FT-IR) results indicated that the absorption peaks of  $\text{Dy}_6$  are mainly located at 3429, 2970, 1600, 1565, 1432, 1136  $\text{cm}^{-1}$ , respectively. The absorption peak at around 3429  $\text{cm}^{-1}$  can be attributed to the stretching vibration of  $\nu(\text{HO-H})$  in the  $\text{H}_2\text{O}$  molecule. The peak around 2970  $\text{cm}^{-1}$  can be attributed to the stretching vibration of  $-\text{CH}_3$ . The strong peaks around 1600  $\text{cm}^{-1}$  and 1565  $\text{cm}^{-1}$  can be attributed to the  $\text{C}=\text{N}$  stretching vibration of the imine group ( $-\text{C}=\text{N}-$ ). The peak around 1432  $\text{cm}^{-1}$  can be attributed to the stretching vibration of the aromatic ring  $\text{C}=\text{N}$  and  $\text{C}=\text{C}$ . The strong absorption peak around 1136  $\text{cm}^{-1}$  can be attributed to the strong vibration between the alcoholic hydroxyl groups  $\text{C}-\text{O}$  in the ligand. The infrared (IR,  $\text{cm}^{-1}$ )

absorption spectrum of **Gd<sub>6</sub>** clusters is similar to that of **Dy<sub>6</sub>**, and its absorption peaks are mainly located at 3429, 2970, 1601, 1568, 1431, 1138  $\text{cm}^{-1}$ , respectively. The absorption peak around 3429  $\text{cm}^{-1}$  can be attributed to the stretching vibration of  $\nu(\text{HO-H})$  in the  $\text{H}_2\text{O}$  molecule. The peak around 2970  $\text{cm}^{-1}$  can be attributed to the stretching vibration of  $-\text{CH}_3$ . The strong peaks around 1601  $\text{cm}^{-1}$  and 1568  $\text{cm}^{-1}$  can be attributed to the  $\text{C}=\text{N}$  stretching vibration of the imine group ( $-\text{C}=\text{N}-$ ). The peak around 1431  $\text{cm}^{-1}$  can be attributed to the stretching vibration of the aromatic ring  $\text{C}=\text{N}$  and  $\text{C}=\text{C}$ . The strong absorption peak around 1138  $\text{cm}^{-1}$  can be attributed to the strong vibration between the alcoholic hydroxyl groups  $\text{C}-\text{O}$  in the ligand. For **HNP-Dy<sub>6</sub>**, the FT-IR absorption peaks are mainly located at 3429, 1601, 1384, 1350, 1200  $\text{cm}^{-1}$ , respectively. The absorption peak around 3429  $\text{cm}^{-1}$  can be attributed to the stretching vibration of  $\nu(\text{HO-H})$  in the  $\text{H}_2\text{O}$  molecule. The strong peak around 1601  $\text{cm}^{-1}$  can be attributed to the  $\text{C}=\text{N}$  stretching vibration of the imine group ( $-\text{C}=\text{N}-$ ). The peaks around 1384  $\text{cm}^{-1}$  and 1350  $\text{cm}^{-1}$  can be attributed to the bending vibration of  $-\text{CH}_3$ . The strong absorption peak around 1200  $\text{cm}^{-1}$  can be attributed to the strong vibration between the alcoholic hydroxyl groups  $\text{C}-\text{O}$  in the ligand.

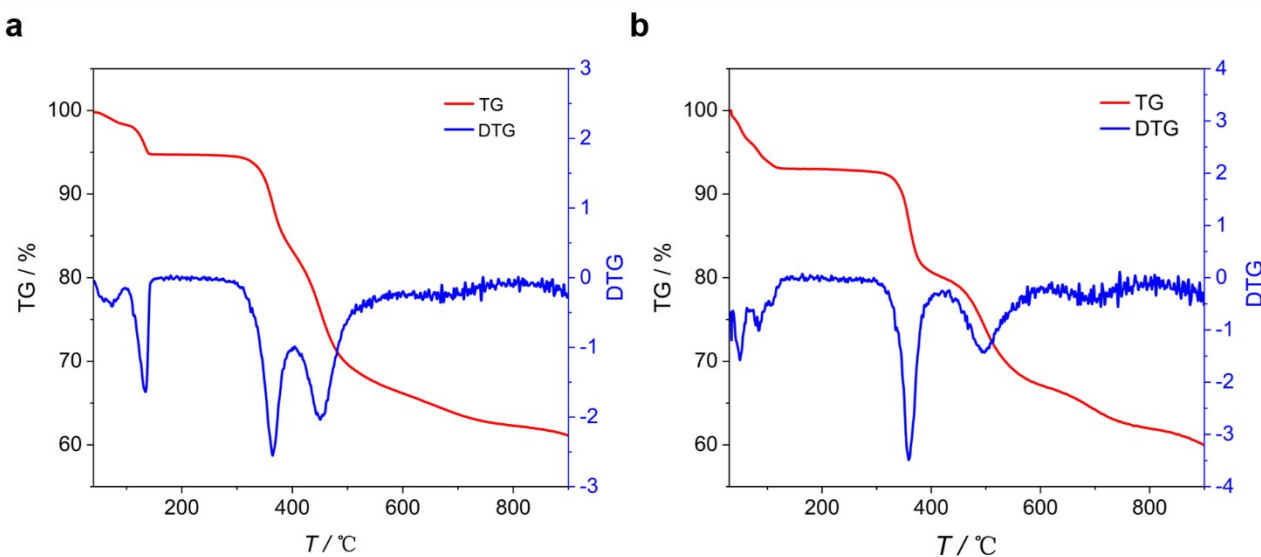

**Figure S2.** TG curve of **Dy<sub>6</sub>** (a) and **HNP-Dy<sub>6</sub>** (b).

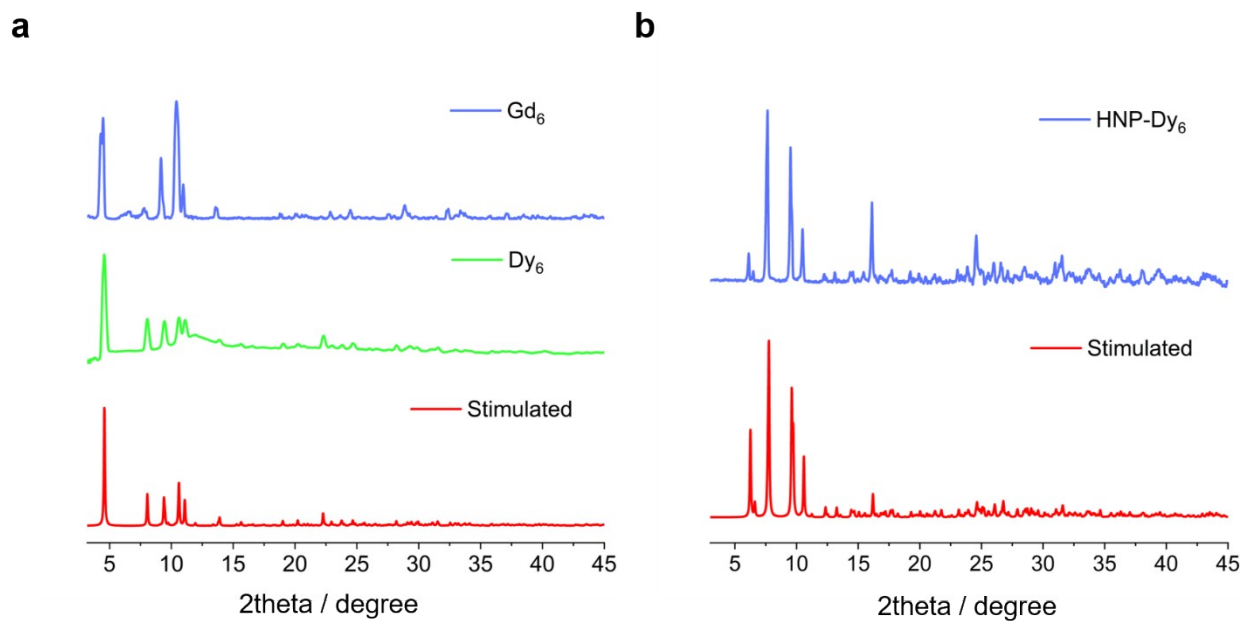

**Figure S3.** Powder diffraction pattern (PXR) of clusters **Dy<sub>6</sub>**, **Gd<sub>6</sub>** (a) and **HNP-Dy<sub>6</sub>** (b).

**Table S6.** Major species assigned in the HRESI-MS of **Dy<sub>6</sub>** in positive mode.

| Fragments                                                                                                                                                                                         | Calc. <i>m/z</i> | Exp. <i>m/z</i> |
|---------------------------------------------------------------------------------------------------------------------------------------------------------------------------------------------------|------------------|-----------------|
| (a) [Dy <sub>6</sub> (L <sup>1</sup> ) <sub>2</sub> (O) <sub>4</sub> (OH) <sub>4</sub> (CH <sub>3</sub> OH) <sub>3</sub> (H <sub>2</sub> O) <sub>2</sub> ] <sup>2+</sup>                          | 1163.59          | 1163.54         |
| (b) [Dy <sub>6</sub> (L <sup>1</sup> ) <sub>2</sub> (O) <sub>4</sub> (CH <sub>3</sub> COO) <sub>2</sub> (OH) <sub>2</sub> (CH <sub>3</sub> OH) <sub>2</sub> ] <sup>2+</sup>                       | 1172.58          | 1172.55         |
| (c) [Dy <sub>6</sub> (L <sup>1</sup> ) <sub>2</sub> (O) <sub>4</sub> (CH <sub>3</sub> COO) <sub>2</sub> (OH) <sub>2</sub> (CH <sub>3</sub> OH) <sub>2</sub> (H <sub>2</sub> O)] <sup>2+</sup>     | 1181.09          | 1181.08         |
| (d) [Dy <sub>6</sub> (L <sup>1</sup> ) <sub>2</sub> (O) <sub>4</sub> (OH) <sub>4</sub> (DMF) <sub>2</sub> (CH <sub>3</sub> OH)] <sup>2+</sup>                                                     | 1188.10          | 1188.08         |
| (e) [Dy <sub>6</sub> (L <sup>1</sup> ) <sub>2</sub> (O) <sub>4</sub> (CH <sub>3</sub> COO) <sub>4</sub> (OH)(H <sub>2</sub> O) <sub>3</sub> ] <sup>+</sup>                                        | 2435.17          | 2435.16         |
| (f) [Dy <sub>6</sub> (L <sup>1</sup> ) <sub>2</sub> (O) <sub>4</sub> (CH <sub>3</sub> COO) <sub>5</sub> (DMF)(H <sub>2</sub> O)] <sup>+</sup>                                                     | 2513.20          | 2513.18         |
| (g) [Dy <sub>6</sub> (L <sup>1</sup> ) <sub>2</sub> (O) <sub>4</sub> (CH <sub>3</sub> COO) <sub>4</sub> (OH)(DMF)(CH <sub>3</sub> OH) <sub>2</sub> (H <sub>2</sub> O) <sub>3</sub> ] <sup>+</sup> | 2572.26          | 2572.22         |

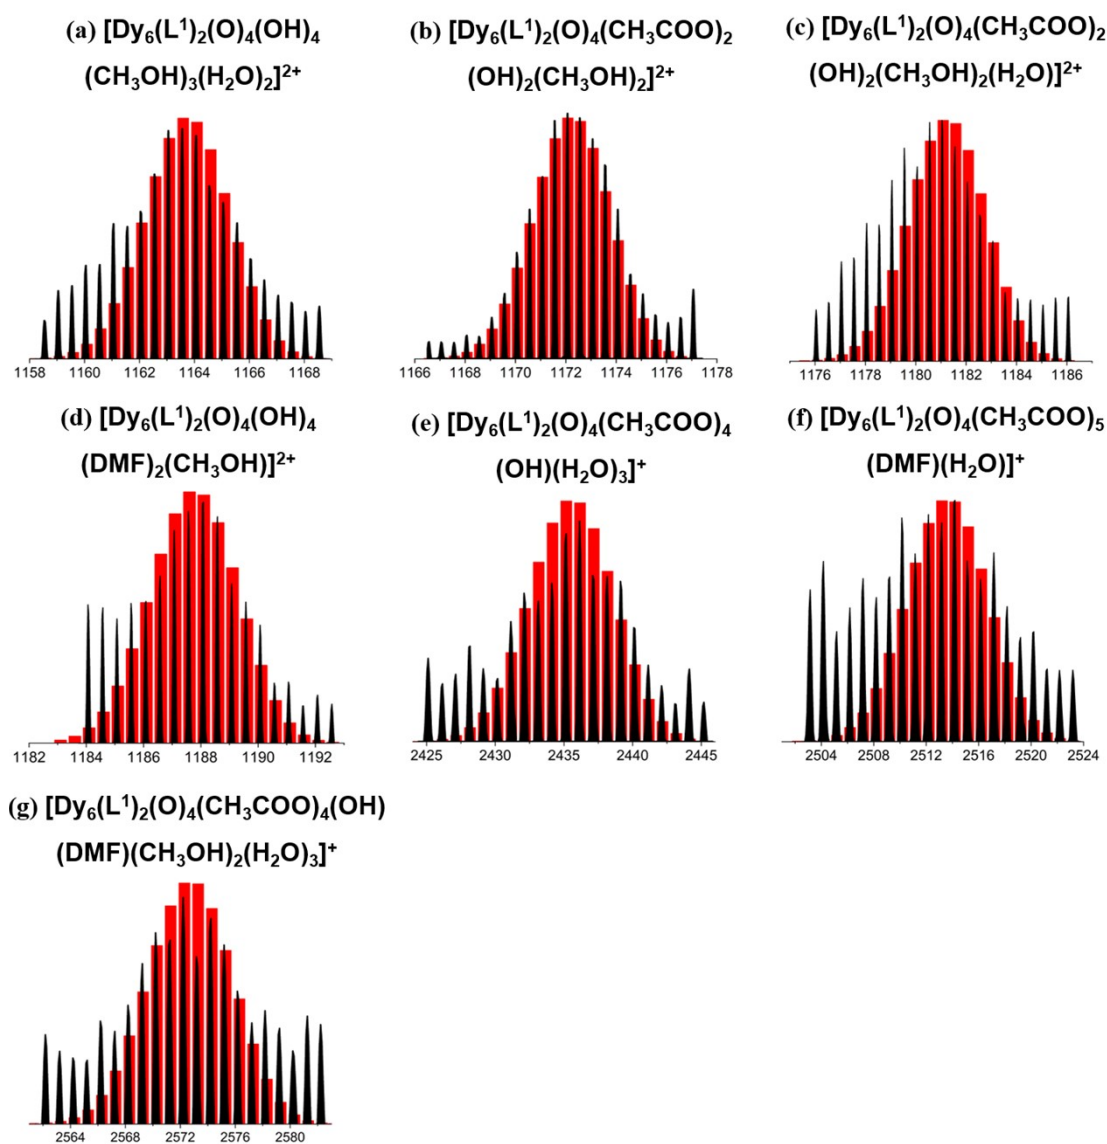**Figure S4.** The superposed simulated and observed spectra of several species for cluster **Dy<sub>6</sub>**.

**Table S7.** Major species assigned in the HRESI-MS of **HNP–Dy<sub>6</sub>** in positive mode.

| Fragments                                                                                                                                                                                                   | Calc. <i>m/z</i> | Exp. <i>m/z</i> |
|-------------------------------------------------------------------------------------------------------------------------------------------------------------------------------------------------------------|------------------|-----------------|
| (a) [Dy <sub>6</sub> (L <sup>2</sup> ) <sub>2</sub> (O) <sub>4</sub> (CH <sub>3</sub> COO) <sub>2</sub> (CH <sub>3</sub> O)(OH) <sub>2</sub> (H <sub>2</sub> O) <sub>2</sub> ] <sup>+</sup>                 | 2261.91          | 2261.87         |
| (b) [Dy <sub>6</sub> (L <sup>2</sup> ) <sub>2</sub> (O) <sub>4</sub> (CH <sub>3</sub> COO) <sub>2</sub> (CH <sub>3</sub> O) <sub>3</sub> (CH <sub>3</sub> OH)(H <sub>2</sub> O)] <sup>+</sup>               | 2302.96          | 2302.89         |
| (c) [Dy <sub>6</sub> (L <sup>2</sup> ) <sub>2</sub> (O) <sub>4</sub> (CH <sub>3</sub> COO) <sub>2</sub> (CH <sub>3</sub> O) <sub>3</sub> (CH <sub>3</sub> OH)(H <sub>2</sub> O) <sub>2</sub> ] <sup>+</sup> | 2321.97          | 2321.89         |
| (d) [Dy <sub>6</sub> (L <sup>2</sup> ) <sub>2</sub> (O) <sub>4</sub> (CH <sub>3</sub> COO) <sub>4</sub> (CH <sub>3</sub> O)(CH <sub>3</sub> OH)(H <sub>2</sub> O) <sub>2</sub> ] <sup>+</sup>               | 2375.96          | 2375.94         |
| (e) [Dy <sub>6</sub> (L <sup>2</sup> ) <sub>2</sub> (O) <sub>4</sub> (CH <sub>3</sub> COO) <sub>4</sub> (CH <sub>3</sub> O)(CH <sub>3</sub> OH) <sub>5</sub> (H <sub>2</sub> O) <sub>5</sub> ] <sup>+</sup> | 2560.09          | 2560.02         |
| (f) [Dy <sub>6</sub> (L <sup>2</sup> ) <sub>2</sub> (O) <sub>4</sub> (CH <sub>3</sub> COO) <sub>4</sub> (CH <sub>3</sub> O)(CH <sub>3</sub> OH) <sub>5</sub> (H <sub>2</sub> O) <sub>6</sub> ] <sup>+</sup> | 2576.10          | 2576.04         |

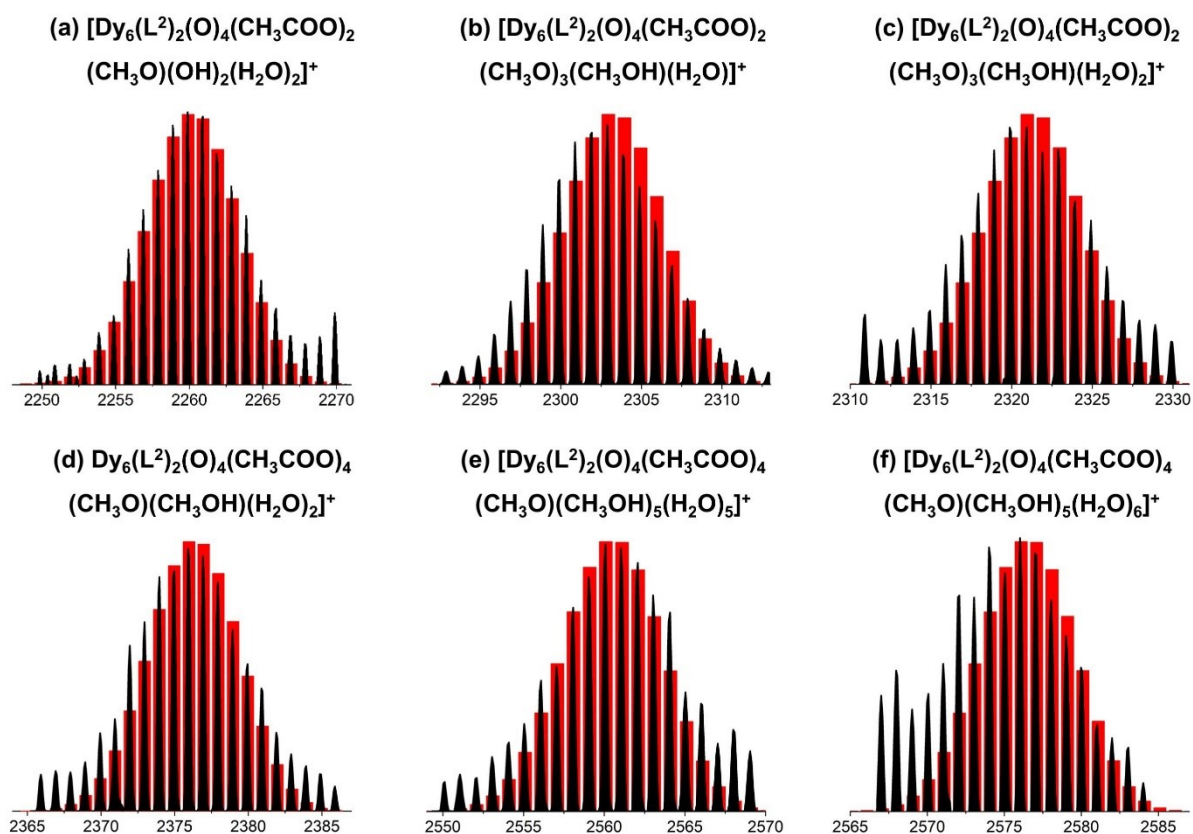**Figure S5.** The superposed simulated and observed spectra of several species for cluster **HNP–Dy<sub>6</sub>**.



**Table S8.** Major species assigned in the HRESI-MS of **Dy<sub>6</sub>** with different in-source CID (0–100 eV) in positive mode.

| Fragments                                                                                                                            | Calc. m/z | Exp. m/z |
|--------------------------------------------------------------------------------------------------------------------------------------|-----------|----------|
| (a) $[\text{Dy}_6(\text{L}^1)_2(\text{O})_4(\text{OH})_4(\text{H}_2\text{O})_5]^{2+}$                                                | 1142.57   | 1142.55  |
| (b) $[\text{Dy}_6(\text{L}^1)_2(\text{O})_4(\text{OH})_4(\text{CH}_3\text{OH})_3(\text{H}_2\text{O})_2]^{2+}$                        | 1163.59   | 1163.56  |
| (c) $[\text{Dy}_6(\text{L}^1)_2(\text{O})_4(\text{CH}_3\text{COO})_2(\text{OH})_3(\text{CH}_3\text{OH})(\text{H}_2\text{O})_4]^{2+}$ | 1199.58   | 1199.58  |
| (d) $[\text{Dy}_6(\text{L}^1)_2(\text{O})_4(\text{CH}_3\text{COO})_2(\text{OH})_3(\text{CH}_3\text{OH})(\text{H}_2\text{O})_5]^+$    | 1209.59   | 1209.54  |
| (e) $[\text{Dy}_6(\text{L}^1)_2(\text{O})_4(\text{CH}_3\text{COO})_4(\text{OH})(\text{H}_2\text{O})_3]^+$                            | 2435.16   | 2435.17  |
| (f) $[\text{Dy}_6(\text{L}^1)_2(\text{O})_4(\text{CH}_3\text{COO})_5(\text{H}_2\text{O})_3]^+$                                       | 2478.17   | 2478.20  |
| (g) $[\text{Dy}_6(\text{L}^1)_2(\text{O})_4(\text{CH}_3\text{COO})_5(\text{DMF})]^+$                                                 | 2495.19   | 2495.20  |

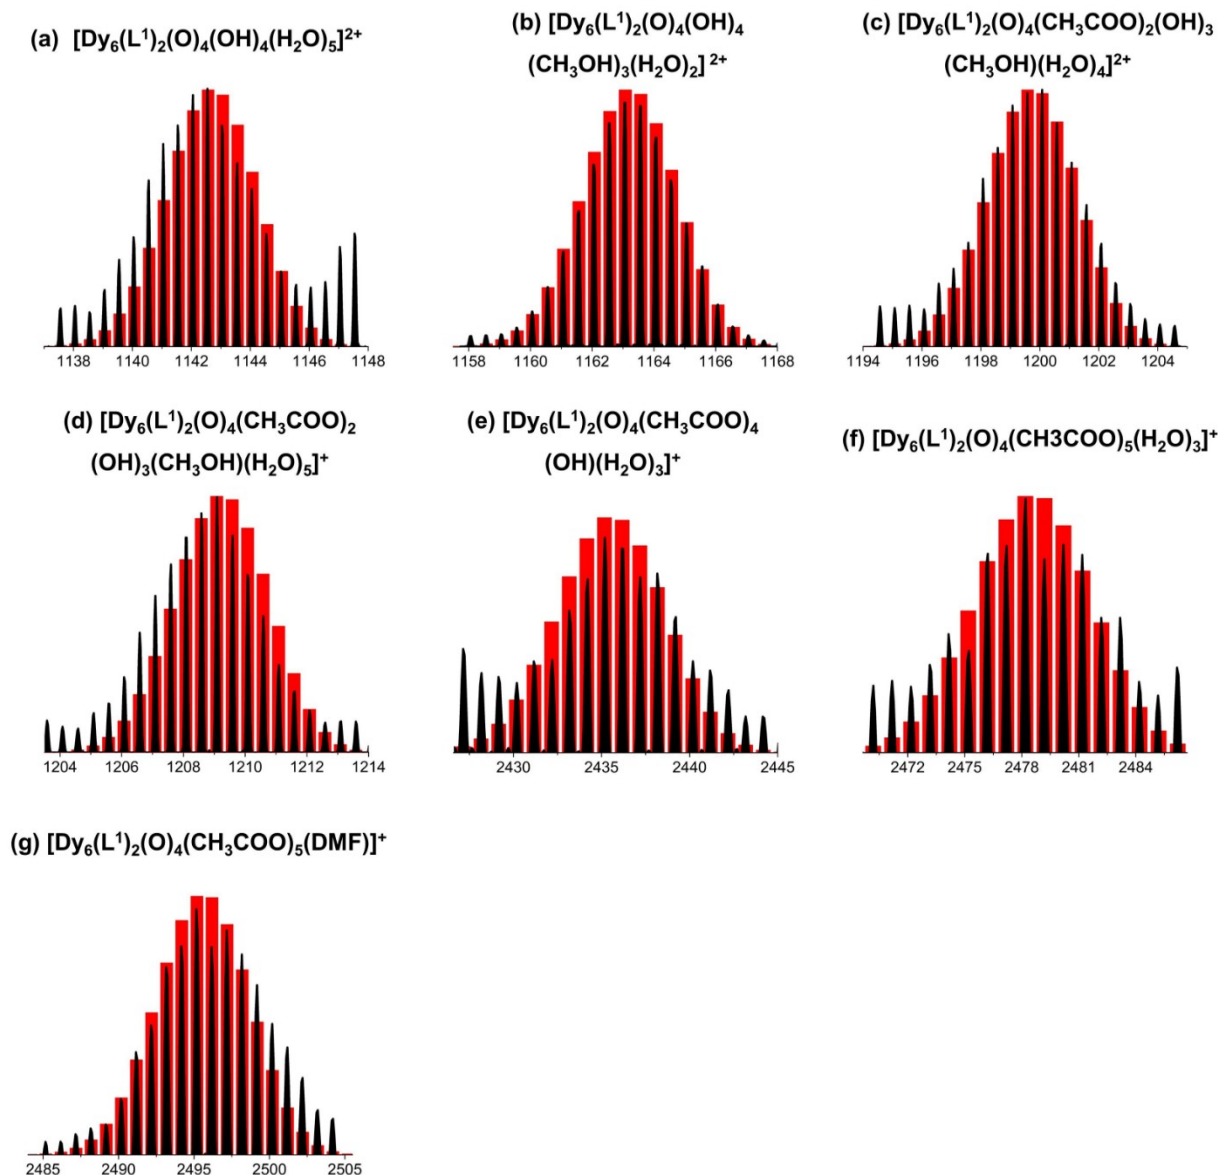

**Figure S6.** The superposed simulated and observed spectra of several species for **Dy<sub>6</sub>** with different in-source CID (0–100 eV).

**Table S9.** Major species assigned in the HRESI-MS of **HNP-Dy<sub>6</sub>** with different in-source CID (0–100 eV) in positive mode.

| Fragments                                                                                                                                                                                                                      | Calc. <i>m/z</i> | Exp. <i>m/z</i> |
|--------------------------------------------------------------------------------------------------------------------------------------------------------------------------------------------------------------------------------|------------------|-----------------|
| (a) [Dy <sub>6</sub> (L <sup>2</sup> ) <sub>2</sub> (O) <sub>4</sub> (CH <sub>3</sub> COO)(CH <sub>3</sub> O) <sub>4</sub> (H <sub>2</sub> O) <sub>2</sub> ] <sup>+</sup>                                                      | 2259.94          | 2259.87         |
| (b) [Dy <sub>6</sub> (L <sup>2</sup> ) <sub>2</sub> (O) <sub>4</sub> (CH <sub>3</sub> O) <sub>3</sub> (OH) <sub>2</sub> (CH <sub>3</sub> OH) <sub>3</sub> (H <sub>2</sub> O) <sub>2</sub> ] <sup>+</sup>                       | 2302.00          | 2301.89         |
| (c) [Dy <sub>6</sub> (L <sup>2</sup> ) <sub>2</sub> (O) <sub>4</sub> (CH <sub>3</sub> O) <sub>3</sub> (OH) <sub>2</sub> (DMF)(CH <sub>3</sub> OH) <sub>3</sub> (H <sub>2</sub> O) <sub>2</sub> ] <sup>+</sup>                  | 2374.05          | 2373.95         |
| (d) [Dy <sub>6</sub> (L <sup>2</sup> ) <sub>2</sub> (O) <sub>4</sub> (CH <sub>3</sub> COO) <sub>2</sub> (CH <sub>3</sub> O) <sub>3</sub> (DMF) <sub>2</sub> (CH <sub>3</sub> OH)(H <sub>2</sub> O) <sub>3</sub> ] <sup>+</sup> | 2485.08          | 2485.00         |
| (e) [Dy <sub>6</sub> (L <sup>2</sup> ) <sub>2</sub> (O) <sub>4</sub> (CH <sub>3</sub> COO) <sub>4</sub> (CH <sub>3</sub> O)(CH <sub>3</sub> OH) <sub>5</sub> (H <sub>2</sub> O) <sub>5</sub> ] <sup>+</sup>                    | 2560.09          | 2560.04         |
| (f) [Dy <sub>6</sub> (L <sup>2</sup> ) <sub>2</sub> (O) <sub>4</sub> (CH <sub>3</sub> COO) <sub>3</sub> (CH <sub>3</sub> O) <sub>2</sub> (CH <sub>3</sub> OH) <sub>6</sub> (H <sub>2</sub> O) <sub>5</sub> ] <sup>+</sup>      | 2562.12          | 2562.02         |

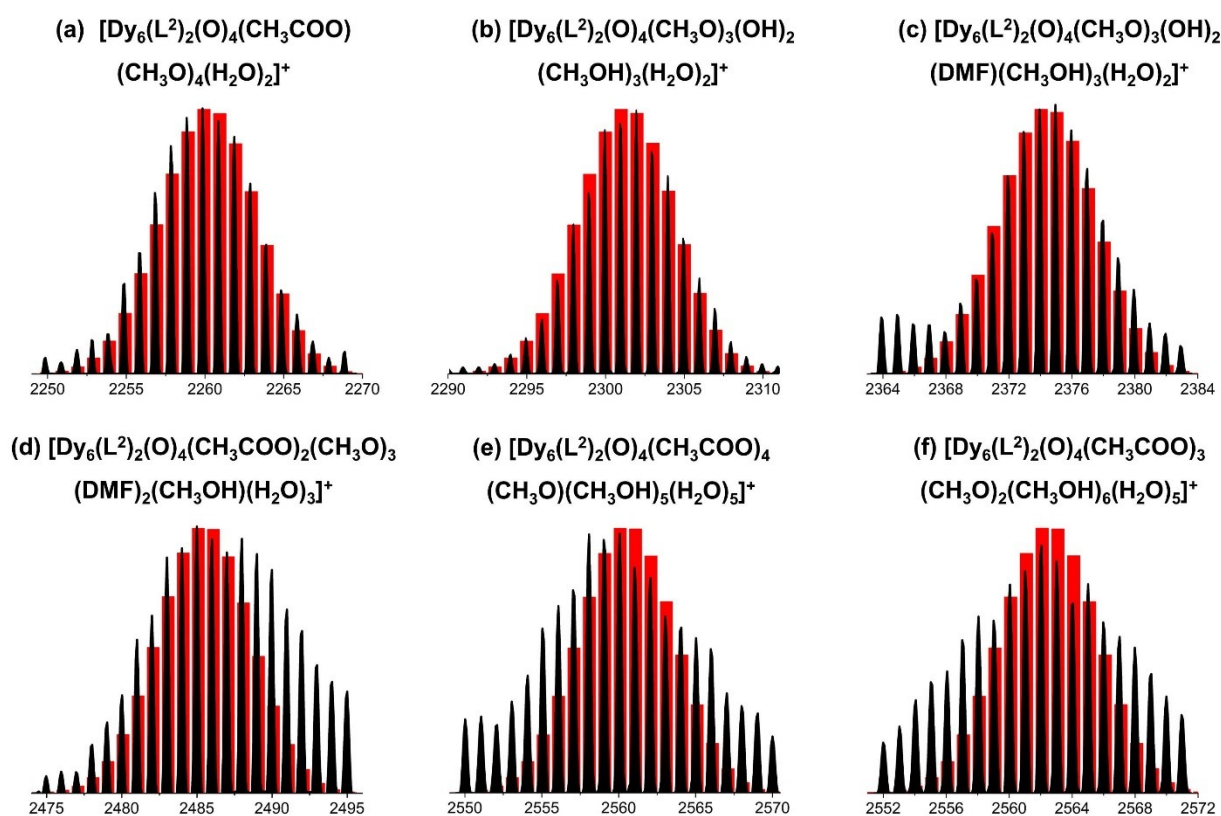

**Figure S7.** The superposed simulated and observed spectra of several species for **HNP-Dy<sub>6</sub>** with different in-source CID (0–100 eV).

**Table S10.** Major species assigned in the Time-dependent HRESI-MS of  $\text{Dy}_6$  in positive mode.

| Fragments                                                                                                                                 | Calc. $m/z$ | Exp. $m/z$ |
|-------------------------------------------------------------------------------------------------------------------------------------------|-------------|------------|
| $[\text{Dy}_2(\text{L}^1)(\text{OH})_2(\text{DMF})_8(\text{CH}_3\text{OH})_6(\text{H}_2\text{O})_4]^{2+}$                                 | 877.38      | 877.49     |
| $[\text{Dy}_2(\text{L}^1)(\text{OH})_2(\text{DMF})_8(\text{CH}_3\text{OH})_5(\text{H}_2\text{O})_6]^{2+}$                                 | 878.37      | 878.48     |
| $[\text{Dy}_2(\text{L}^1)(\text{OH})_2(\text{DMF})_8(\text{CH}_3\text{OH})_8(\text{H}_2\text{O})_2]^{2+}$                                 | 891.40      | 891.50     |
| $[\text{Dy}_3(\text{L}^1)(\text{OH})_6(\text{DMF})(\text{H}_2\text{O})_2]^+$                                                              | 1242.13     | 1242.03    |
| $[\text{Dy}_3(\text{L}^1)(\text{OH})_6(\text{CH}_3\text{OH})_2(\text{H}_2\text{O})_2]^+$                                                  | 1265.16     | 1265.08    |
| $[\text{Dy}_3(\text{L}^1)(\text{OH})_6(\text{DMF})_2(\text{CH}_3\text{OH})_2]^+$                                                          | 1345.07     | 1345.23    |
| $[\text{Dy}_3(\text{L}^1)(\text{OH})_6(\text{DMF})_2(\text{CH}_3\text{OH})_2(\text{H}_2\text{O})_4]^+$                                    | 1416.26     | 1416.14    |
| $[\text{Dy}_6(\text{L}^1)_2(\text{O})_4(\text{CH}_3\text{COO})(\text{OH})_3(\text{CH}_3\text{OH})_2]^{2+}$                                | 1151.58     | 1151.53    |
| $[\text{Dy}_6(\text{L}^1)_2(\text{O})_4(\text{OH})_4(\text{CH}_3\text{OH})_3(\text{H}_2\text{O})_2]^{2+}$                                 | 1163.59     | 1163.54    |
| $[\text{Dy}_6(\text{L}^1)_2(\text{O})_4(\text{CH}_3\text{COO})_2(\text{OH})_2(\text{CH}_3\text{OH})_2]^{2+}$                              | 1172.58     | 1172.55    |
| $[\text{Dy}_6(\text{L}^1)_2(\text{O})_4(\text{CH}_3\text{COO})_2(\text{OH})_2(\text{CH}_3\text{OH})_2(\text{H}_2\text{O})]^{2+}$          | 1181.09     | 1181.08    |
| $[\text{Dy}_6(\text{L}^1)_2(\text{O})_4(\text{OH})_4(\text{DMF})_2(\text{CH}_3\text{OH})]^{2+}$                                           | 1188.10     | 1188.08    |
| $[\text{Dy}_6(\text{L}^1)_2(\text{O})_4(\text{CH}_3\text{COO})_5(\text{DMF})]^+$                                                          | 2496.21     | 2496.20    |
| $[\text{Dy}_6(\text{L}^1)_2(\text{O})_4(\text{CH}_3\text{COO})_5(\text{DMF})(\text{H}_2\text{O})]^+$                                      | 2513.20     | 2513.18    |
| $[\text{Dy}_6(\text{L}^1)_2(\text{O})_4(\text{CH}_3\text{COO})_4(\text{OH})(\text{DMF})(\text{CH}_3\text{OH})_2(\text{H}_2\text{O})_3]^+$ | 2572.26     | 2572.22    |

$\text{Dy}_2(\text{L}^1)(\text{OH})_2(\text{DMF})_8(\text{CH}_3\text{OH})_6(\text{H}_2\text{O})_4]^{2+}$      $[\text{Dy}_2(\text{L}^1)(\text{OH})_2(\text{DMF})_8(\text{CH}_3\text{OH})_5(\text{H}_2\text{O})_6]^{2+}$      $[\text{Dy}_2(\text{L}^1)(\text{OH})_2(\text{DMF})_8(\text{CH}_3\text{OH})_8(\text{H}_2\text{O})_2]^{2+}$   
 cala. 877.38 exp. 877.49                      cala. 878.37 exp. 878.48                      cala. 891.40 exp. 891.50

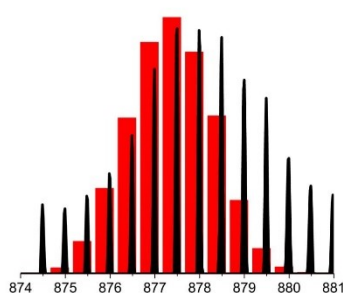

$[\text{Dy}_3(\text{L}^1)(\text{OH})_6(\text{DMF})(\text{H}_2\text{O})_2]^+$   
 cala. 1242.13 exp. 1242.03

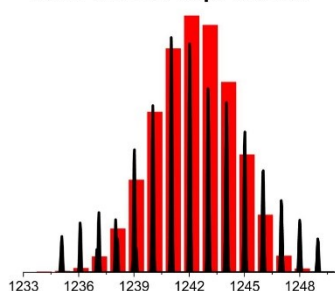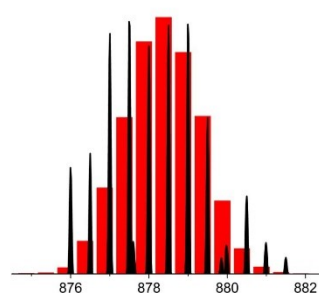

$[\text{Dy}_3(\text{L}^1)(\text{OH})_6(\text{CH}_3\text{OH})_2(\text{H}_2\text{O})_2]^+$   
 cala. 1265.16 exp. 1265.07

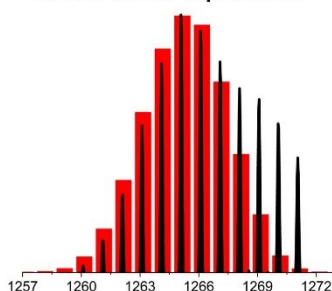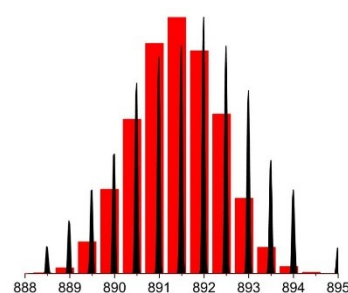

$[\text{Dy}_3(\text{L}^1)(\text{OH})_6(\text{DMF})_2(\text{CH}_3\text{OH})_2]^+$   
 cala. 1345.07 exp. 1345.23

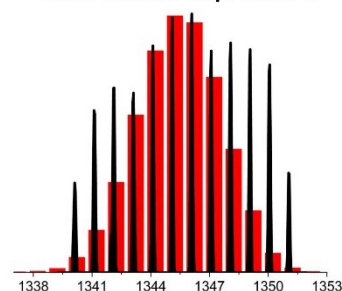

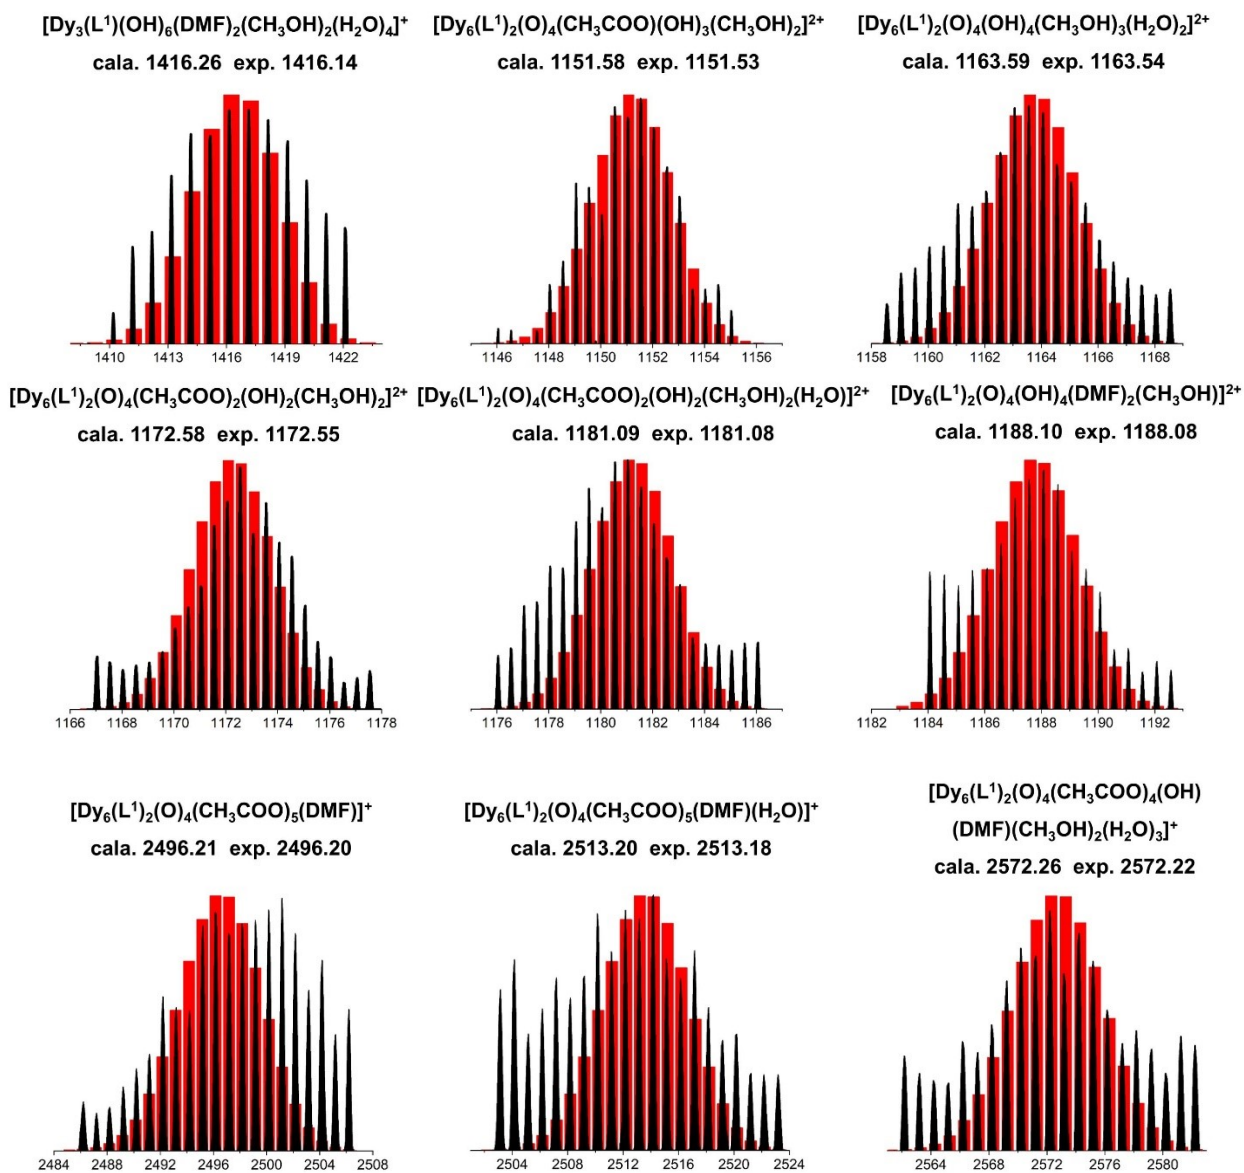

**Figure S8.** Time-dependent HRESI-MS spectra for the assembly of  $Dy_6$  in positive mode.

**Table S11.** Major species assigned in the Time-dependent HRESI-MS of **HNP-Dy<sub>6</sub>** in positive mode.

| Fragments                                                                                                                               | Calc. m/z | Exp. m/z |
|-----------------------------------------------------------------------------------------------------------------------------------------|-----------|----------|
| $[\text{Dy}_2(\text{L}^2)(\text{CH}_3\text{O})_2(\text{OH})(\text{H}_2\text{O})]^+$                                                     | 925.16    | 925.03   |
| $[\text{Dy}_2(\text{L}^2)(\text{CH}_3\text{O})_2(\text{OH})(\text{CH}_3\text{OH})(\text{H}_2\text{O})_4]^+$                             | 1009.10   | 1008.93  |
| $[\text{Dy}_2(\text{L}^2)(\text{OH})_3(\text{DMF})_2(\text{CH}_3\text{OH})(\text{H}_2\text{O})]^+$                                      | 1071.14   | 1070.96  |
| $[\text{Dy}_3(\text{L}^2)(\text{OH})_6(\text{DMF})_3(\text{CH}_3\text{OH})]^+$                                                          | 1342.13   | 1342.08  |
| $[\text{Dy}_3(\text{L}^2)(\text{OH})_6(\text{DMF})(\text{CH}_3\text{OH})_3(\text{H}_2\text{O})_6]^+$                                    | 1370.16   | 1370.07  |
| $[\text{Dy}_3(\text{L}^2)(\text{OH})_6(\text{DMF})(\text{CH}_3\text{OH})_4(\text{H}_2\text{O})_2]^+$                                    | 1448.22   | 1448.08  |
| $[\text{Dy}_3(\text{L}^2)(\text{OH})_6(\text{DMF})_2(\text{CH}_3\text{OH})_5(\text{H}_2\text{O})_7]^+$                                  | 1524.26   | 1524.10  |
| $[\text{Dy}_5(\text{L}^2)_2(\text{O})_4(\text{OH})_2]^+$                                                                                | 1919.95   | 1919.98  |
| $[\text{Dy}_5(\text{L}^2)_2(\text{O})_4(\text{OH})_2(\text{CH}_3\text{OH})]^+$                                                          | 1946.94   | 1946.96  |
| $[\text{Dy}_5(\text{L}^2)_2(\text{O})_4(\text{OH})_2(\text{CH}_3\text{OH})(\text{H}_2\text{O})]^+$                                      | 1967.98   | 1967.96  |
| $[\text{Dy}_6(\text{L}^2)_2(\text{O})_4(\text{CH}_3\text{COO})_2(\text{CH}_3\text{O})(\text{OH})_2(\text{H}_2\text{O})_2]^+$            | 2261.91   | 2261.87  |
| $[\text{Dy}_6(\text{L}^2)_2(\text{O})_4(\text{CH}_3\text{COO})_2(\text{CH}_3\text{O})_3(\text{CH}_3\text{OH})(\text{H}_2\text{O})]^+$   | 2302.96   | 2302.87  |
| $[\text{Dy}_6(\text{L}^2)_2(\text{O})_4(\text{CH}_3\text{COO})_2(\text{CH}_3\text{O})_3(\text{CH}_3\text{OH})(\text{H}_2\text{O})_2]^+$ | 2321.97   | 2321.89  |
| $[\text{Dy}_6(\text{L}^2)_2(\text{O})_4(\text{CH}_3\text{COO})_4(\text{CH}_3\text{O})(\text{CH}_3\text{OH})(\text{H}_2\text{O})_2]^+$   | 2375.96   | 2375.94  |
| $[\text{Dy}_6(\text{L}^2)_2(\text{O})_4(\text{CH}_3\text{COO})_4(\text{CH}_3\text{O})(\text{CH}_3\text{OH})_5(\text{H}_2\text{O})_5]^+$ | 2560.09   | 2560.02  |
| $[\text{Dy}_6(\text{L}^2)_2(\text{O})_4(\text{CH}_3\text{COO})_4(\text{CH}_3\text{O})(\text{CH}_3\text{OH})_5(\text{H}_2\text{O})_6]^+$ | 2576.10   | 2576.04  |

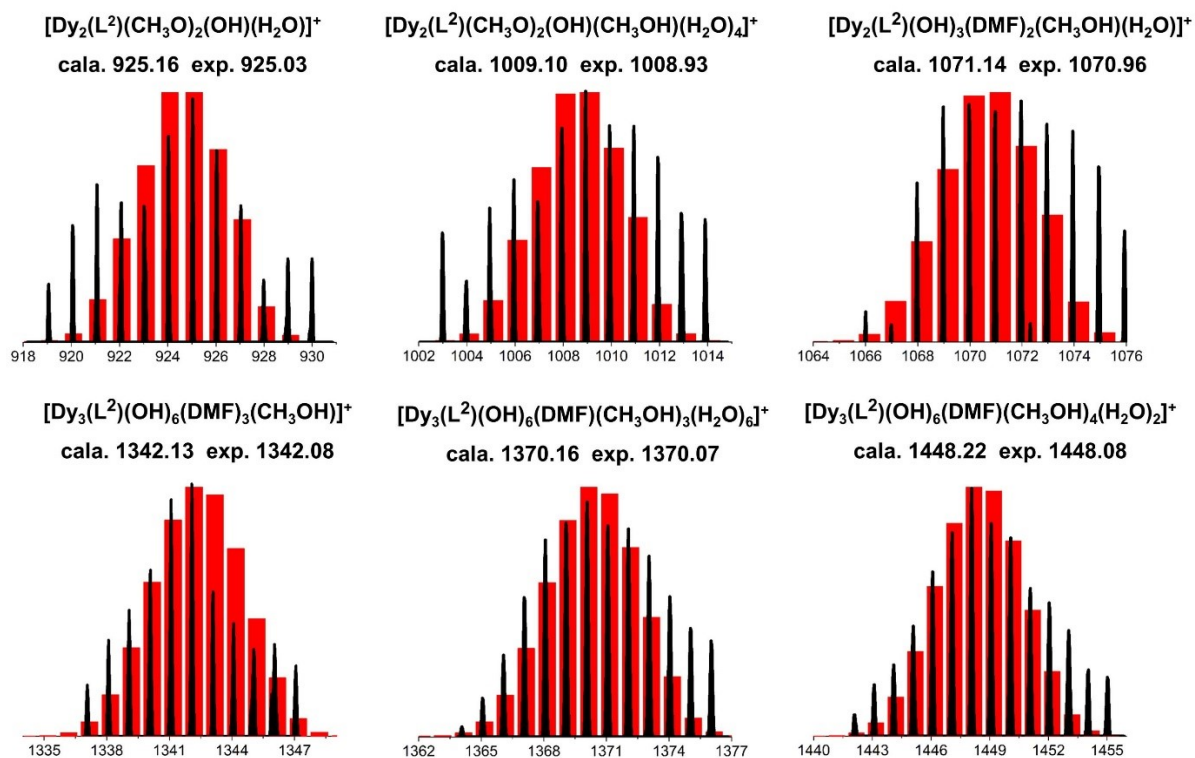



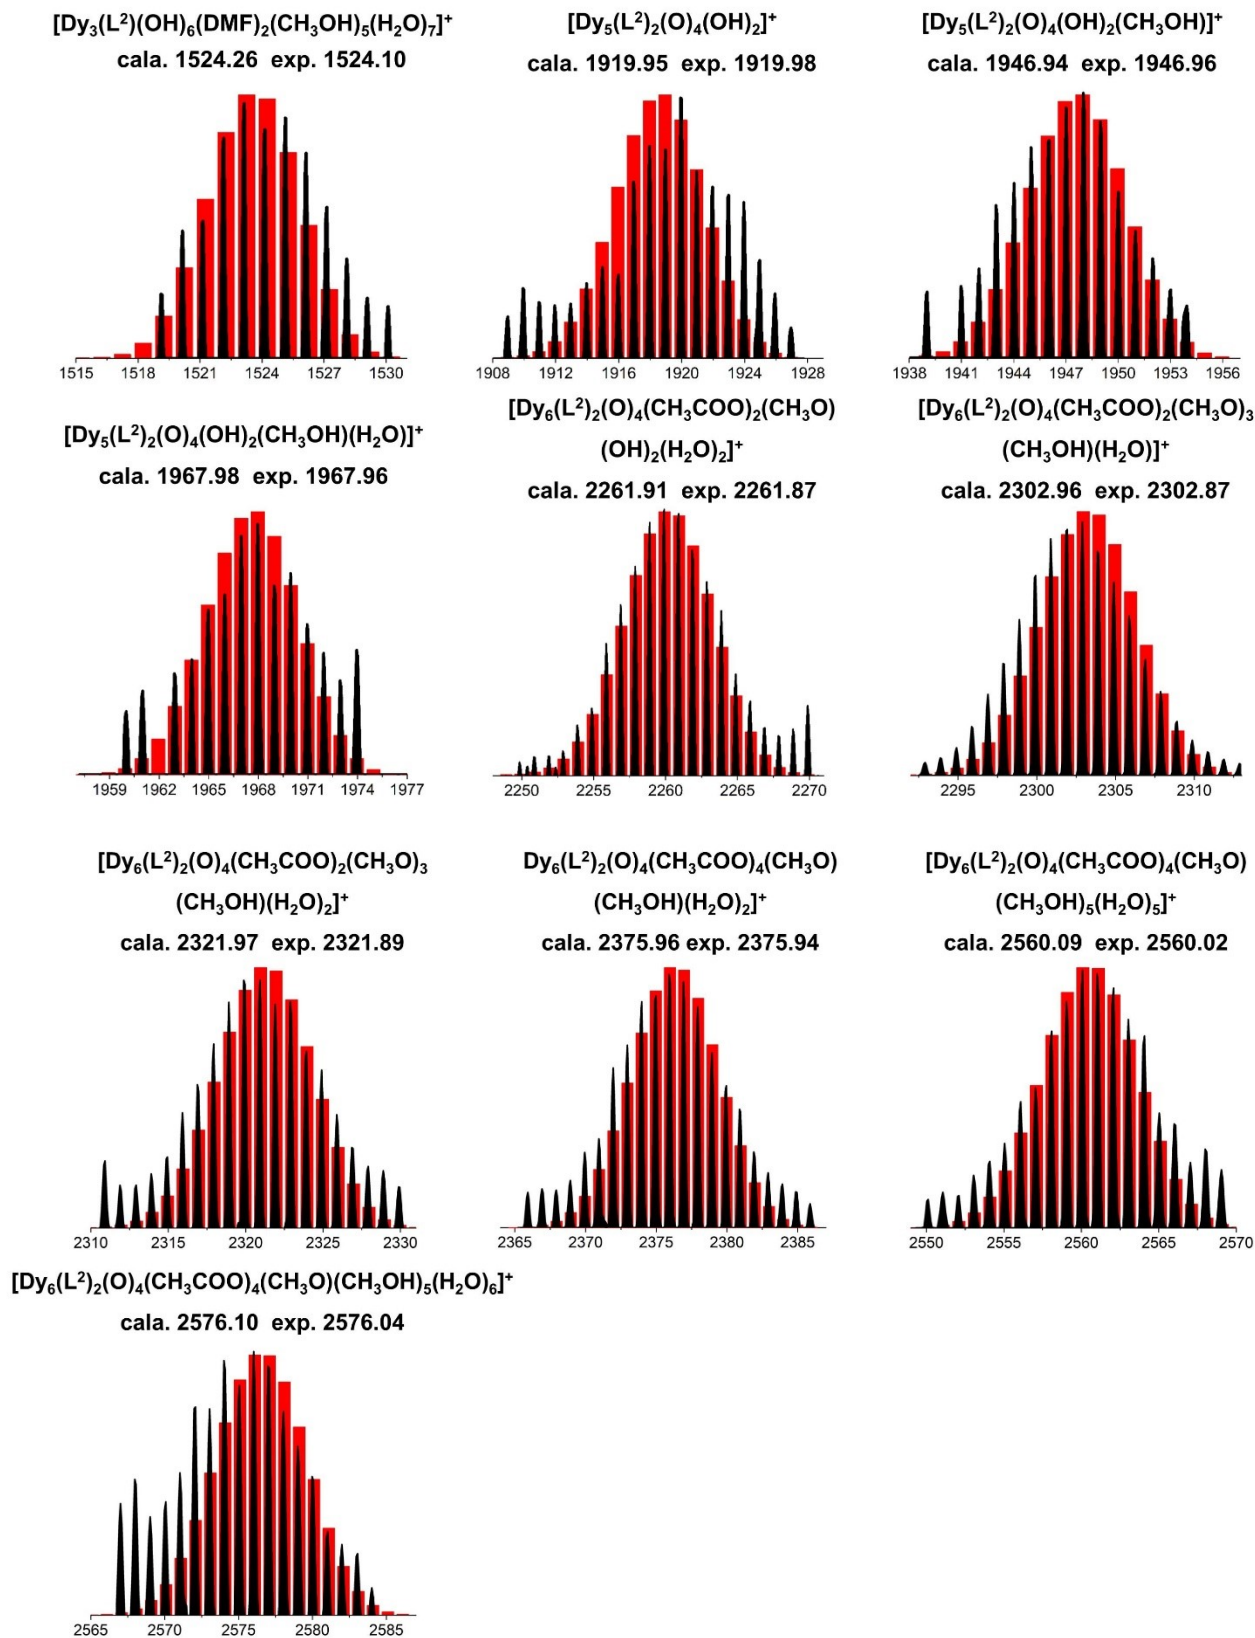

**Figure S9.** Time-dependent HRESI-MS spectra for the assembly of HNP-Dy<sub>6</sub> in positive mode.

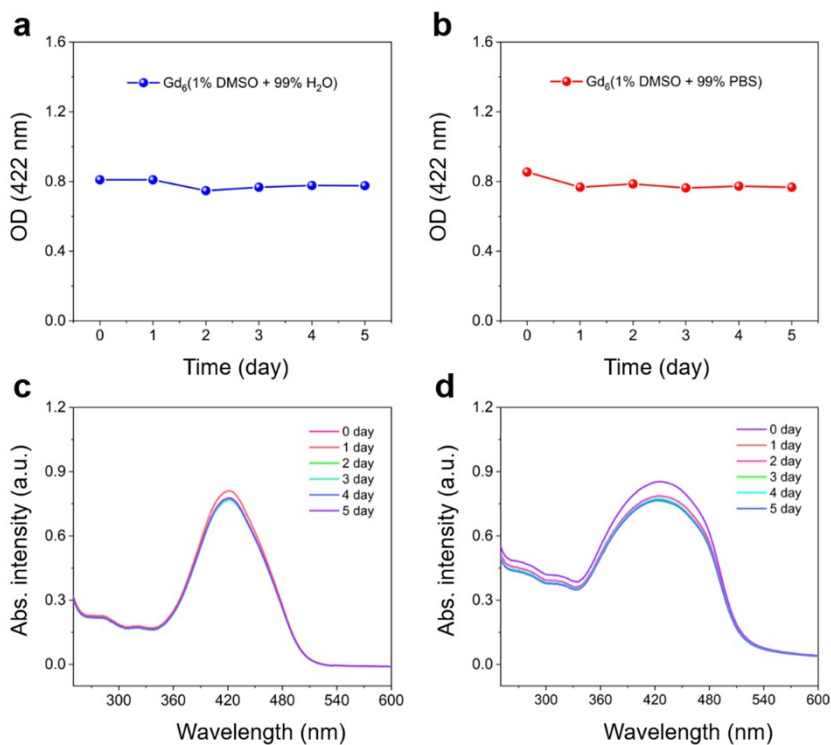

**Figure S10.** Stability of  $Gd_6$  dispersed in (a)  $H_2O$  and (b) PBS for 5 days, UV-Vis absorption spectra of  $Gd_6$  in (c)  $H_2O$  and (d) PBS.

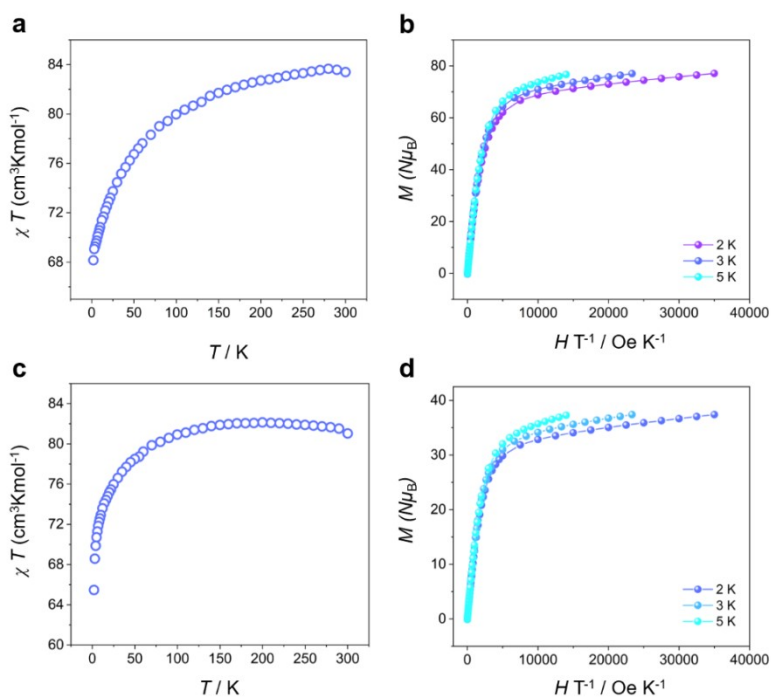

**Figure S11.** Temperature dependence of  $\chi_m T$  for (a)  $Dy_6$  and (c) HNP- $Dy_6$ ,  $M$  vs.  $H/T$  plots of (b)  $Dy_6$  and (d) HNP- $Dy_6$ .

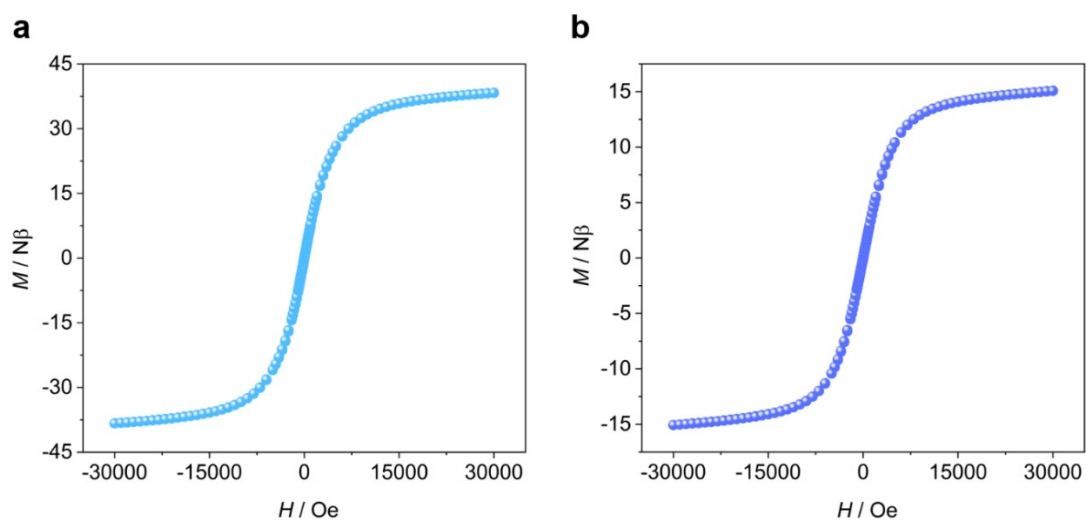

**Figure S12.** Loop curve graph of  $\text{Dy}_6$  (a) and  $\text{HNP-Dy}_6$  (b) at 2 K.

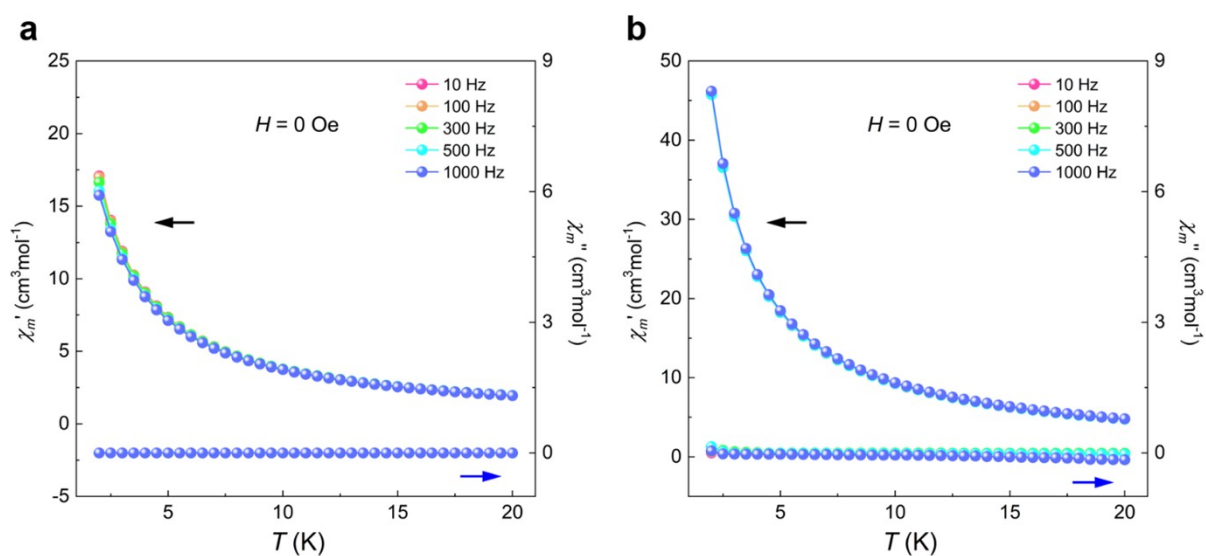

**Figure S13.** Temperature dependence of the real ( $\chi'$ ) and imaginary ( $\chi''$ ) ac susceptibilities at different frequencies in the 0 Oe dc fields for  $\text{Dy}_6$  (a) and  $\text{HNP-Dy}_6$  (b).



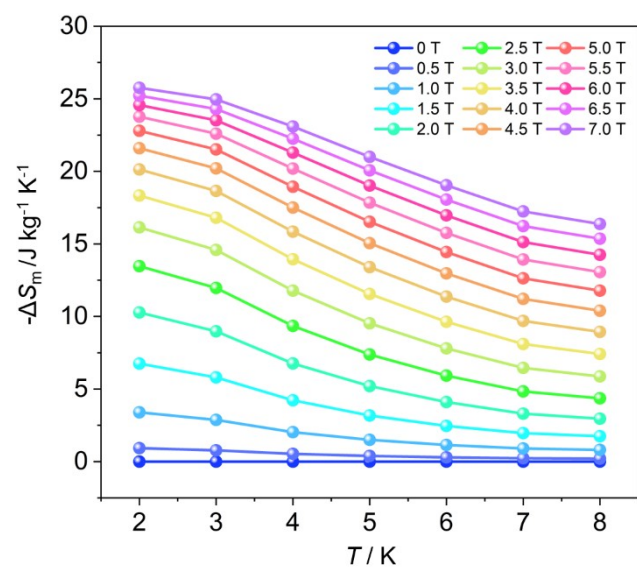

**Figure S14.** Magnetic entropy change ( $-\Delta S_m$ ) of  $\text{Gd}_6$  at different temperatures (2–8 K) and magnetic fields (0–7 T).
